# Supplementary material for: Thermodynamic Analysis of the Adsorption and Micellization Activity of the Mixtures of Rhamnolipid and Surfactin with Triton X-165
Source: MDPI journal article supplement (doi:10.3390/molecules27113600), 2022-06-03
Supplement: s1 [file s1]

**Table S1.** The values of the the mole fraction of the surfactants in the mixed monolayer ( $x_1^S$  – TX165,  $x_2^S$  – RL), parameter of intermolecular interaction ( $\beta^\sigma$ ), activity coefficients ( $f_1^S$  and  $f_2^S$ ) and Gibbs excess free energy of mixing ( $G_{mix}^E$ ).

| $\gamma_{LV}$ [mN/m] | $x_1^S$ | $x_2^S$ | $\beta^\sigma$ | $f_1^S$ | $f_2^S$ | $G_{mix}^E$<br>[kJ/mol] |
|----------------------|---------|---------|----------------|---------|---------|-------------------------|
| $x_2^b = 0.2$        |         |         |                |         |         |                         |
| 70                   | 0.6607  | 0.3393  | -2.0802        | 0.7870  | 0.4033  | -1.1360                 |
| 65                   | 0.6654  | 0.3346  | -2.3366        | 0.7698  | 0.3554  | -1.2673                 |
| 60                   | 0.6539  | 0.3461  | -1.3074        | 0.8550  | 0.5718  | -0.7208                 |
| 55                   | 0.4152  | 0.5848  | -2.3955        | 0.4408  | 0.6617  | -1.4169                 |
| $x_2^b = 0.4$        |         |         |                |         |         |                         |
| 70                   | 0.5655  | 0.4345  | -0.6910        | 0.8777  | 0.8017  | -0.4136                 |
| 65                   | 0.5406  | 0.4594  | -3.8980        | 0.4393  | 0.3201  | -2.3582                 |
| 60                   | 0.5244  | 0.4756  | 0.8195         | 1.2036  | 1.2528  | 0.4979                  |
| 55                   | 0.3418  | 0.6582  | -3.3947        | 0.2298  | 0.6726  | -1.8604                 |
| $x_2^b = 0.6$        |         |         |                |         |         |                         |
| 70                   | 0.4189  | 0.5811  | -0.7973        | 0.7640  | 0.8695  | -0.4728                 |
| 65                   | 0.3984  | 0.6016  | 0.3979         | 1.1549  | 1.0652  | 0.2323                  |
| 60                   | 0.3472  | 0.6528  | -0.3991        | 0.8436  | 0.9530  | -0.2203                 |
| 55                   | 0.2105  | 0.7895  | -2.1039        | 0.2694  | 0.9110  | -0.8516                 |
| $x_2^b = 0.8$        |         |         |                |         |         |                         |
| 70                   | 0.2840  | 0.7160  | -1.1865        | 0.5443  | 0.9088  | -0.5877                 |
| 65                   | 0.2620  | 0.7380  | -0.5808        | 0.7288  | 0.9609  | -0.2736                 |
| 60                   | 0.2339  | 0.7661  | -1.0286        | 0.5468  | 0.9453  | -0.4489                 |
| 55                   | 0.1736  | 0.8264  | -3.0037        | 0.1286  | 0.9135  | -1.0497                 |

**Table S2.** The values of the the mole fraction of the surfactants in the mixed monolayer ( $x_1^S$  – TX165,  $x_2^S$  – SF), parameter of intermolecular interaction ( $\beta^\sigma$ ) activity coefficients ( $f_1^S$  and  $f_2^S$ ) and Gibbs excess free energy of mixing ( $G_{mix}^E$ ).

| $\gamma_{LV}$ [mN/m] | $x_1^S$ | $x_2^S$ | $\beta^\sigma$ | $f_1^S$ | $f_2^S$ | $G_{mix}^E$<br>[kJ/mol] |
|----------------------|---------|---------|----------------|---------|---------|-------------------------|
| $x_2^b = 0.2$        |         |         |                |         |         |                         |
| 70                   | 0.3518  | 0.6482  | 0.3484         | 1.1576  | 1.0441  | 0.1935                  |
| 65                   | 0.2600  | 0.7400  | 0.6884         | 1.4578  | 1.0476  | 0.3226                  |
| 60                   | 0.1331  | 0.8669  | 0.9803         | 2.0890  | 1.0175  | 0.2756                  |
| 55                   | 0.0585  | 0.9415  | -0.0932        | 0.9207  | 0.9997  | -0.0125                 |
| $x_2^b = 0.4$        |         |         |                |         |         |                         |
| 70                   | 0.1262  | 0.8738  | 0.5973         | 1.5779  | 1.0096  | 0.1604                  |
| 65                   | 0.1139  | 0.8861  | 0.4603         | 1.4353  | 1.0060  | 0.1131                  |
| 60                   | 0.0722  | 0.9278  | 0.4892         | 1.5237  | 1.0026  | 0.0798                  |
| 55                   | 0.0522  | 0.9478  | -1.0516        | 0.3888  | 0.9971  | -0.1267                 |
| $x_2^b = 0.6$        |         |         |                |         |         |                         |
| 70                   | 0.1531  | 0.8469  | -0.8491        | 0.5439  | 0.9803  | -0.2682                 |
| 65                   | 0.0947  | 0.9053  | -0.3074        | 0.7773  | 0.9972  | -0.0642                 |
| 60                   | 0.0240  | 0.9760  | 0.7964         | 2.1353  | 1.0005  | 0.0455                  |
| 55                   | 0.0203  | 0.9797  | -0.8086        | 0.4602  | 0.9997  | -0.0391                 |
| $x_2^b = 0.8$        |         |         |                |         |         |                         |
| 70                   | 0.0989  | 0.9011  | -1.3348        | 0.3383  | 0.9870  | -0.2898                 |
| 65                   | 0.0534  | 0.9466  | -0.6864        | 0.5406  | 0.9980  | -0.0845                 |
| 60                   | 0.0114  | 0.9886  | 0.5553         | 1.7207  | 1.0001  | 0.0152                  |
| 55                   | 0.0097  | 0.9903  | -1.0278        | 0.3650  | 0.9999  | -0.0241                 |

**Table S3.** The values of the the mole fraction of the surfactants in the mixed micelle ( $x_1^M$ - TX165,  $x_2^M$  – RL or SF), parameter of intermolecular interaction ( $\beta^M$ ), activity coefficients ( $f_1^M$  and  $f_2^M$ ) and Gibbs excess free energy of mixing( $G_{mix}^{E,m}$ ).

| TX165 + SF |         |         |           |         |         |                             |
|------------|---------|---------|-----------|---------|---------|-----------------------------|
| $x_2^b$    | $x_1^M$ | $x_2^M$ | $\beta^M$ | $f_1^M$ | $f_2^M$ | $G_{mix}^{E,m}$<br>[kJ/mol] |
| 0.2        | 0.2597  | 0.7403  | -3.3116   | 0.1628  | 0.7998  | -1.5509                     |
| 0.4        | 0.2463  | 0.7537  | -4.9288   | 0.0608  | 0.7416  | -2.2286                     |
| 0.6        | 0.2192  | 0.7808  | -5.6293   | 0.0323  | 0.7629  | -2.3474                     |
| 0.8        | 0.1371  | 0.8629  | -4.9207   | 0.0256  | 0.9117  | -1.4177                     |
| TX165 + RL |         |         |           |         |         |                             |
| $x_2^b$    | $x_1^M$ | $x_2^M$ | $\beta^M$ | $f_1^M$ | $f_2^M$ | $G_{mix}^{E,m}$<br>(kJ/mol) |
| 0.2        | 0.4017  | 0.5983  | -2.8276   | 0.3634  | 0.6337  | -1.6554                     |
| 0.4        | 0.2374  | 0.7626  | -1.4631   | 0.4270  | 0.9209  | -0.6452                     |
| 0.6        | 0.1492  | 0.8508  | -1.4336   | 0.3543  | 0.9686  | -0.4434                     |
| 0.8        | 0.1369  | 0.8631  | -2.5969   | 0.1445  | 0.9525  | -0.7474                     |

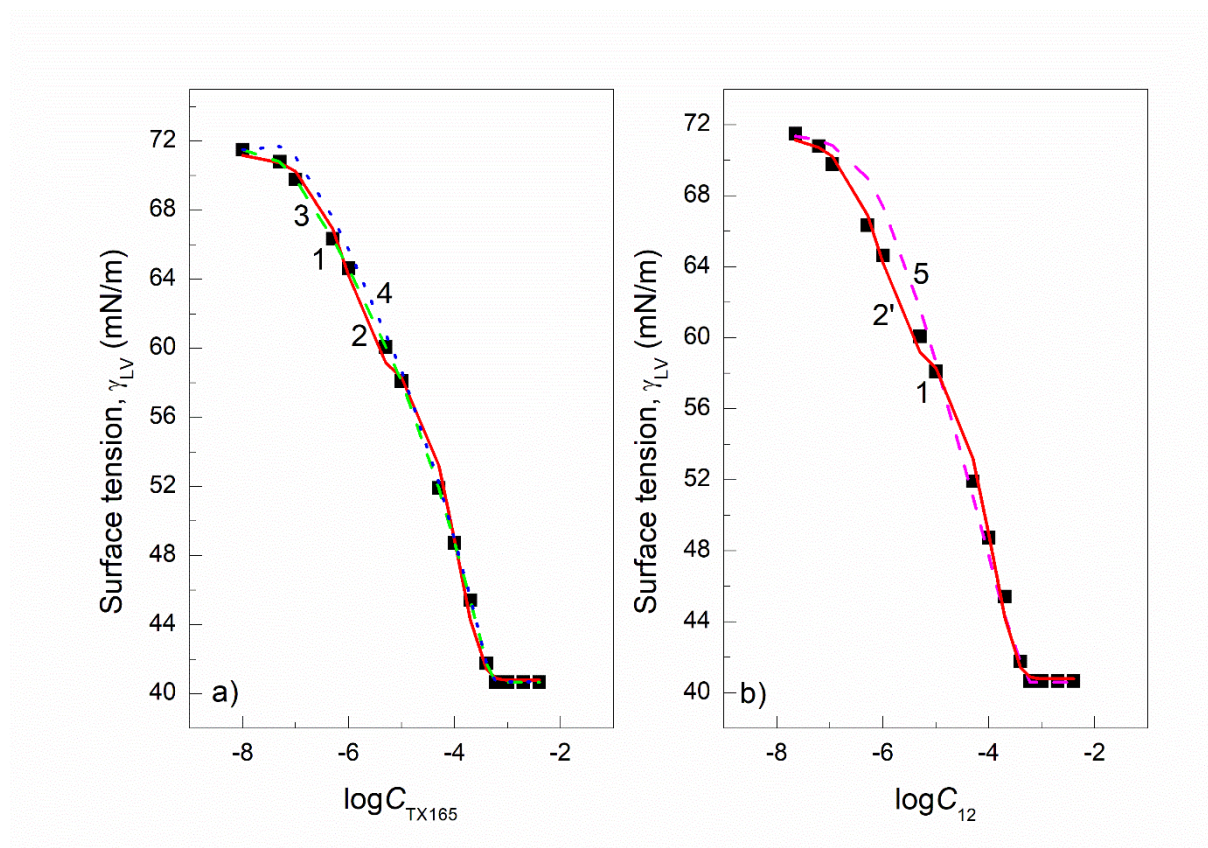

**Figure S1.** A plot of the surface tension ( $\gamma_{LV}$ ) of the aqueous solution of RL and TX165 mixture at the constant RL concentration equal to 0.00625 mg/dm<sup>3</sup> vs. the logarithm of the TX165 concentration ( $C_{TX165}$ ) (a) and the logarithm of the total concentration of the TX165 + RL mixture ( $C_{12}$ ) (b). Points 1 correspond to the measured values. Curves 2 and 2' correspond to the value calculated from Eq. (1), curves 3, 4 and 5 correspond to the values calculated from Eqs. (3), (4) and (2), respectively.

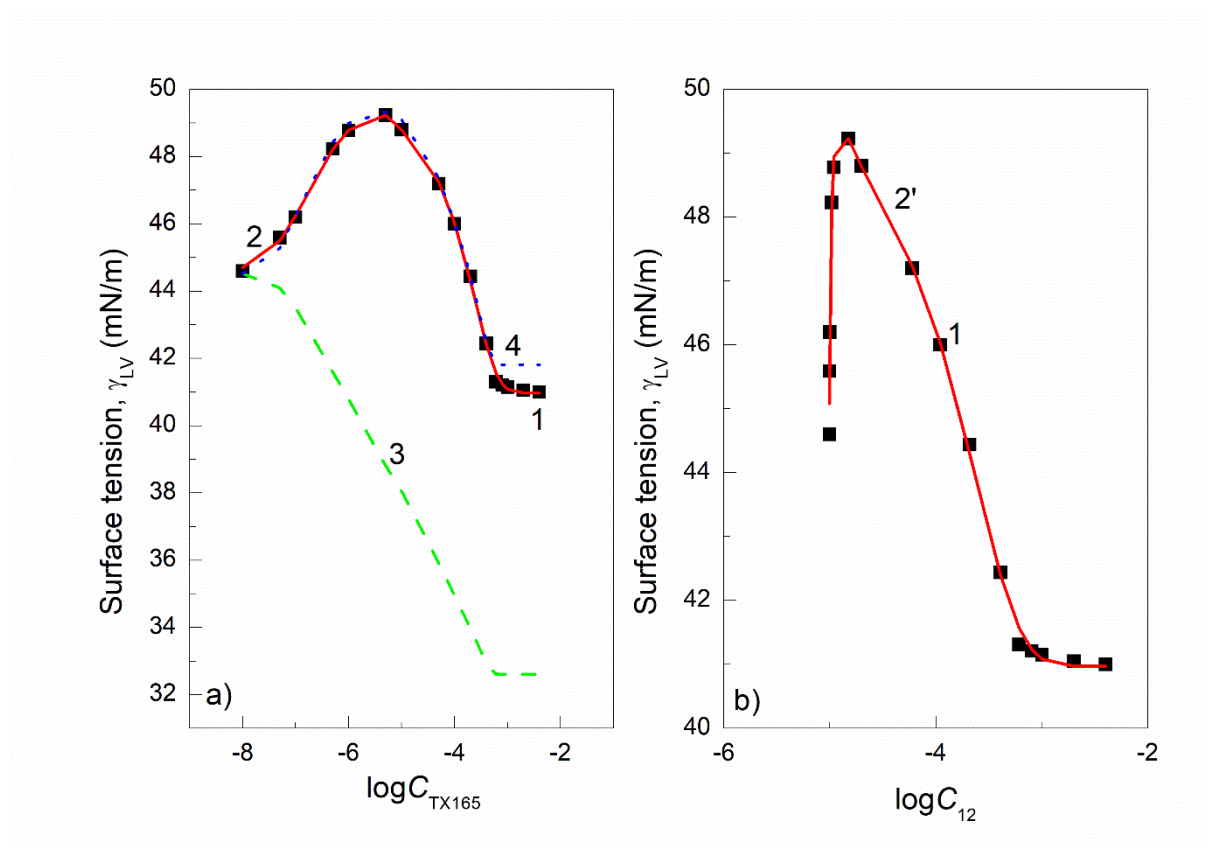

**Figure S2.** A plot of the surface tension ( $\gamma_{LV}$ ) of the aqueous solution of RL and TX165 mixture at the constant RL concentration equal to 5 mg/dm<sup>3</sup> vs. the logarithm of the TX165 concentration ( $C_{TX165}$ ) (a) and the logarithm of the total concentration of the TX165 + RL mixture ( $C_{12}$ ) (b). Points 1 correspond to the measured values. Curves 2 and 2' correspond to the values calculated from Eq. (1), curves 3 and 4 correspond to the values calculated from Eqs. (3) and (4), respectively.

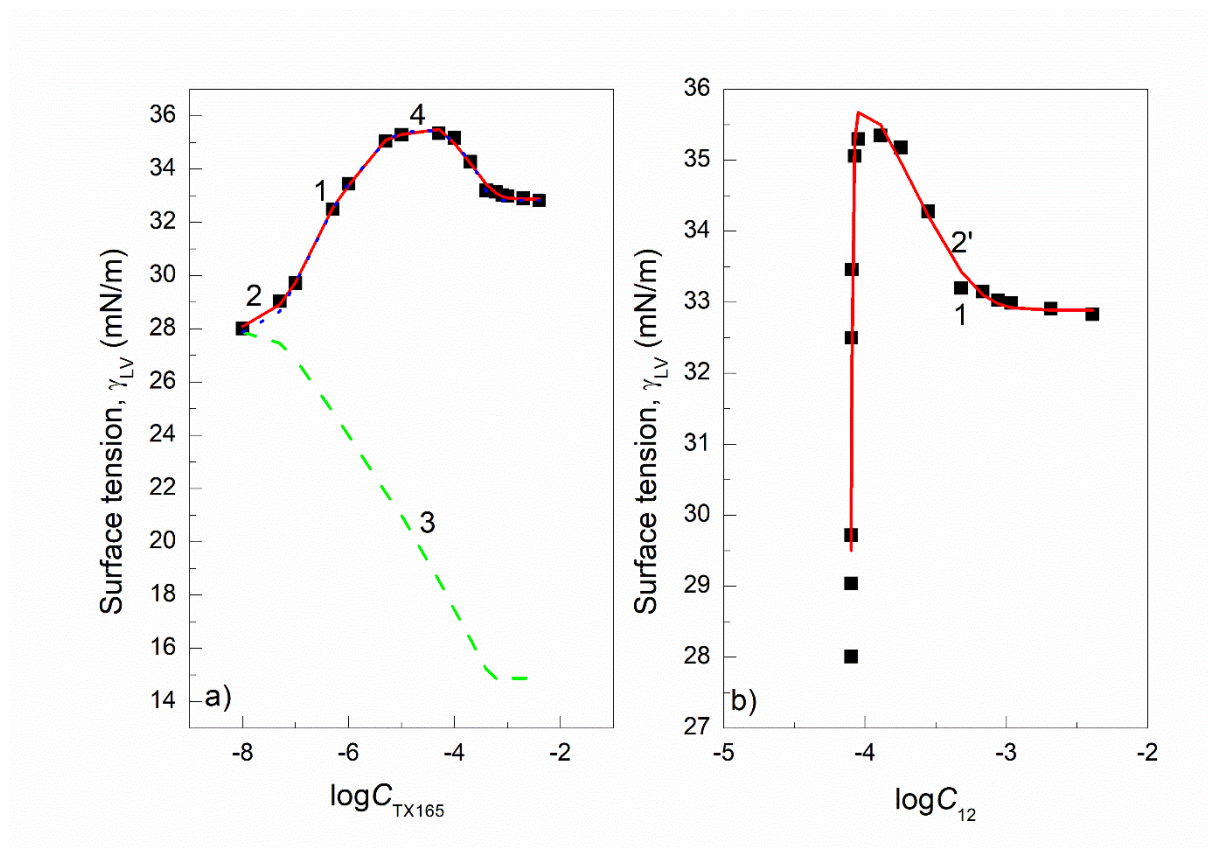

**Figure S3.** A plot of the surface tension ( $\gamma_{LV}$ ) of the aqueous solution of RL and TX165 mixture at the constant RL concentration equal to 40 mg/dm<sup>3</sup> vs. the logarithm of the TX165 concentration ( $C_{TX165}$ ) (a) and the logarithm of the total concentration of the TX165 + RL mixture ( $C_{12}$ ) (b). Points 1 correspond to the measured values. Curves 2 and 2' correspond to the values calculated from Eq. (1), curves 3 and 4 correspond to the values calculated from Eqs. (3) and (4), respectively.



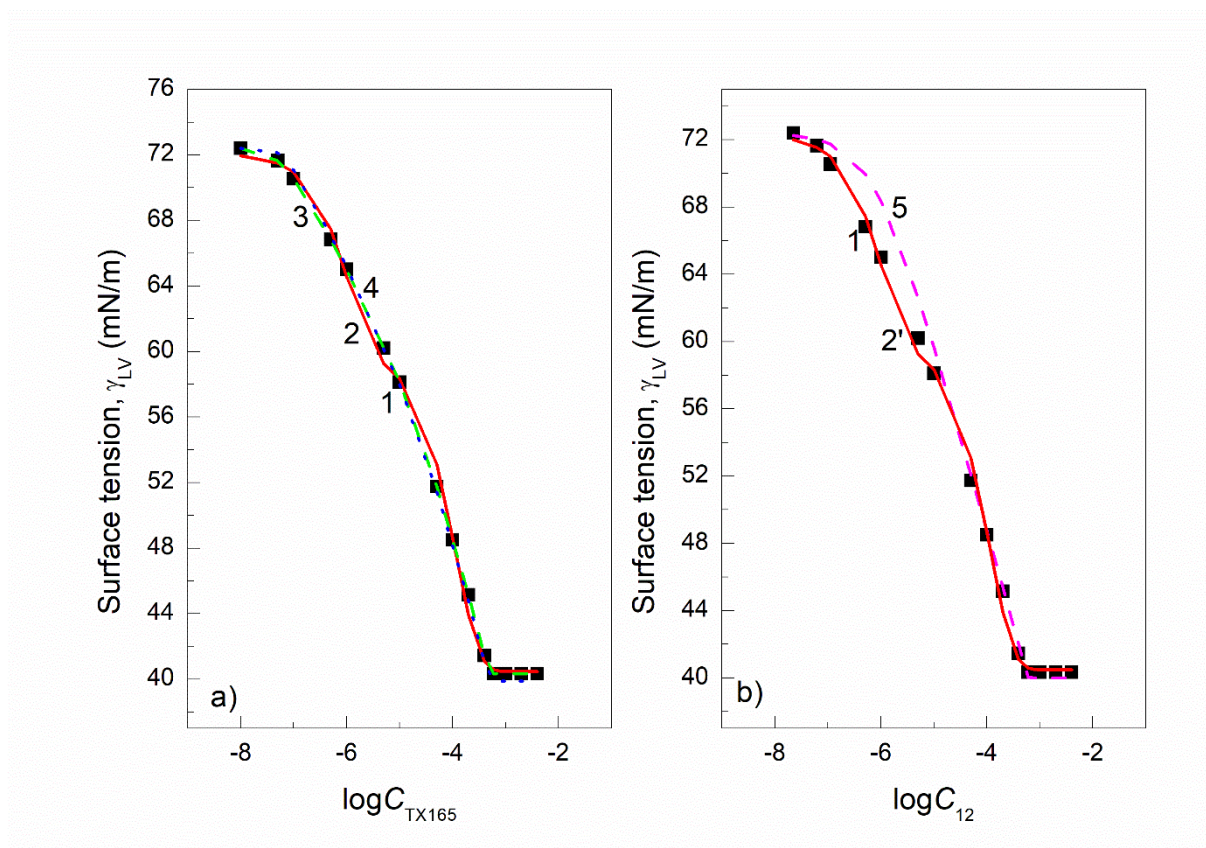

**Figure S4.** A plot of the surface tension ( $\gamma_{LV}$ ) of the aqueous solution of SF and TX165 mixture at the constant SF concentration equal to  $0.00625 \text{ mg/dm}^3$  vs. the logarithm of the TX165 concentration ( $C_{TX165}$ ) (a) and the logarithm of the total concentration of the TX165 + SF mixture ( $C_{12}$ ) (b). Points 1 correspond to the measured values. Curves 2 and 2' correspond to the values calculated from Eq. (1), curves 3, 4 and 5 correspond to the values calculated from Eqs. (3), (4) and (2), respectively.

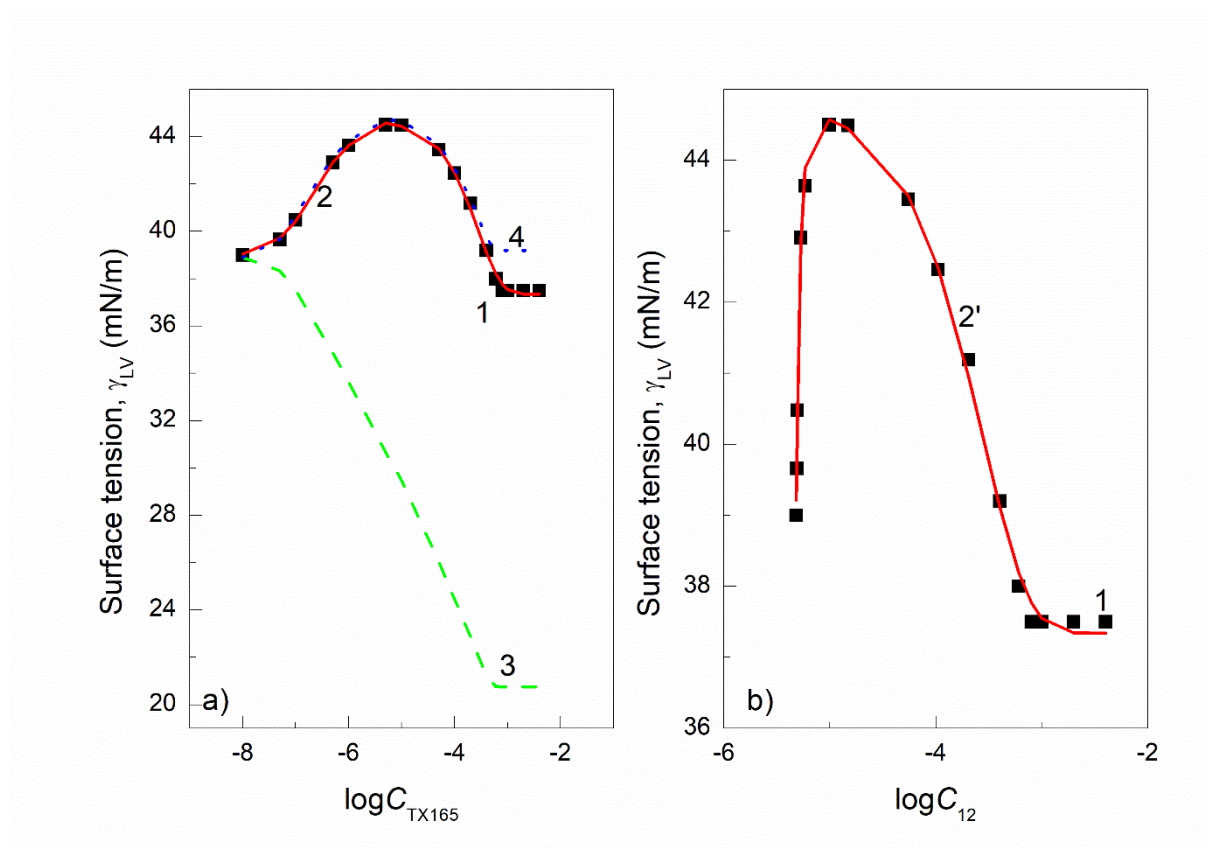

**Figure S5.** A plot of the surface tension ( $\gamma_{LV}$ ) of aqueous solution of SF and TX165 mixture at the constant SF concentration equal to 5 mg/dm<sup>3</sup> vs. the logarithm of the TX165 concentration ( $C_{TX165}$ ) (a) and the logarithm of the total concentration of the TX165 + SF mixture ( $C_{12}$ ) (b). Points 1 correspond to the measured values. Curves 2 and 2' correspond to the values calculated from Eq. (1), curves 3 and 4 correspond to the values calculated from Eqs. (3) and (4), respectively.



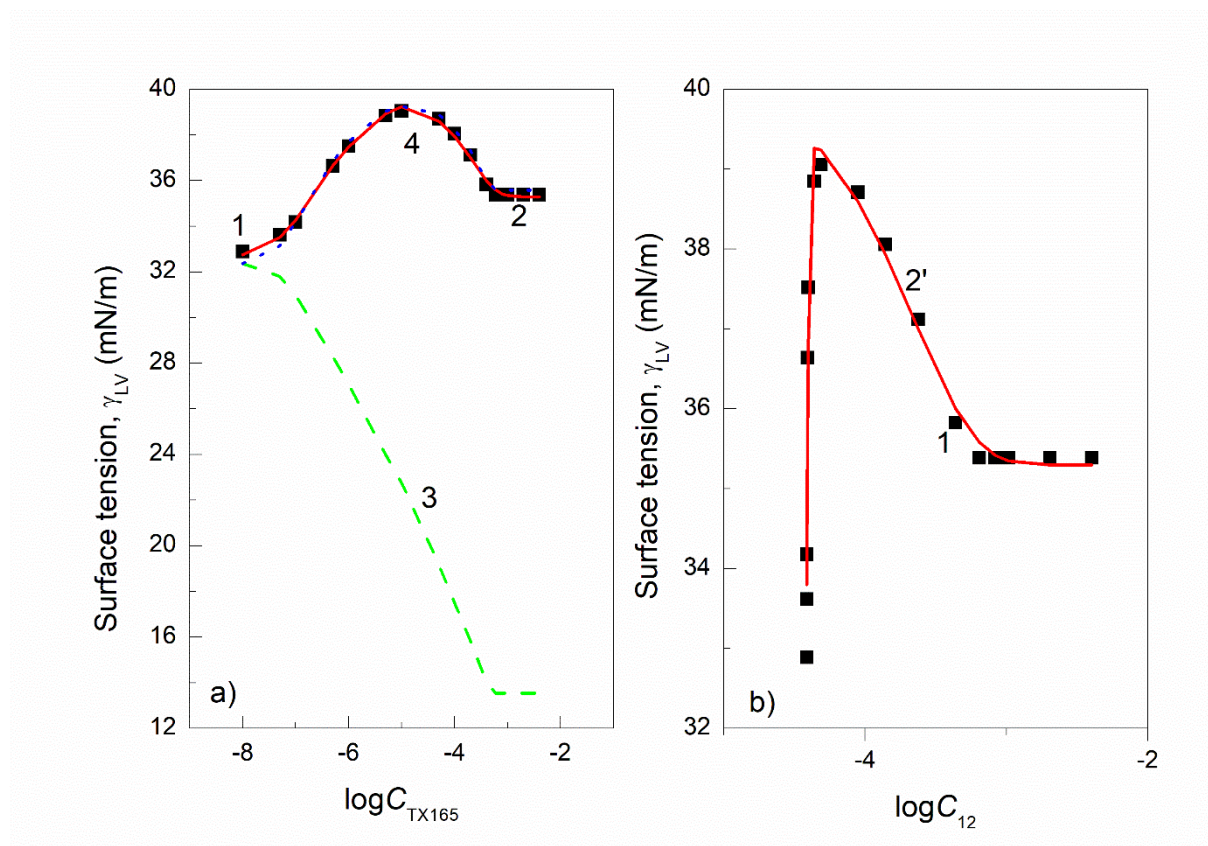

**Figure S6.** A plot of the surface tension ( $\gamma_{LV}$ ) of the aqueous solution of SF and TX165 mixture at the constant SF concentration equal to 40 mg/dm<sup>3</sup> vs. the logarithm of the TX165 concentration ( $C_{TX165}$ ) (a) and the logarithm of the total concentration of the TX165 + SF mixture ( $C_{12}$ ) (b). Points 1 correspond to the measured values. Curves 2 and 2' correspond to the values calculated from Eq. (1), curves 3 and 4 correspond to the values calculated from Eqs. (3) and (4), respectively.

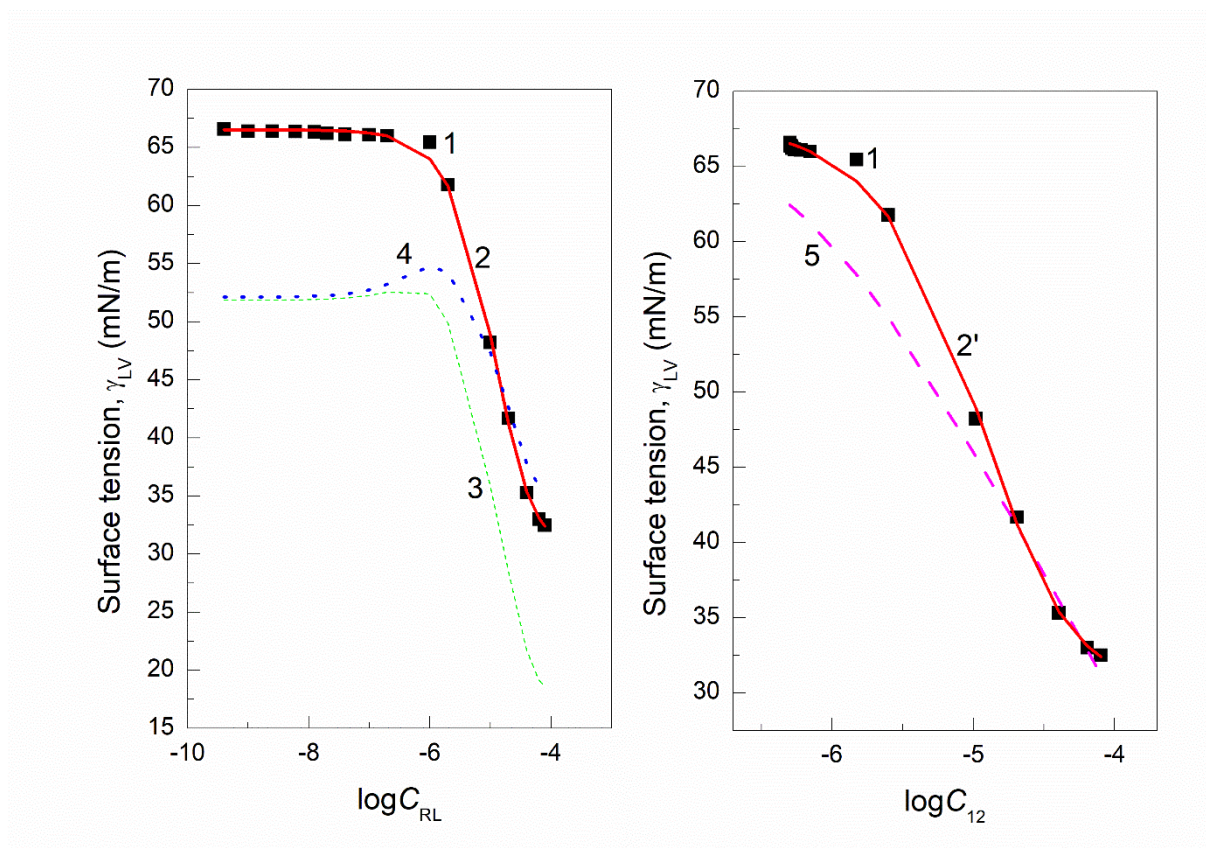

**Figure S7.** A plot of the surface tension ( $\gamma_{LV}$ ) of the aqueous solution of RL and TX165 mixture at the constant TX165 concentration equal to  $5 \times 10^{-7}$  mole/dm<sup>3</sup> vs. the logarithm of the RL concentrations ( $C_{RL}$ ) (a) and the logarithm of the total concentration of the TX165 + RL mixture ( $C_{12}$ ) (b). Points 1 correspond to the measured values. Curves 2 and 2' correspond to the values calculated from Eq. (1), curves 3, 4 and 5 correspond to the values calculated from Eqs. (3), (4) and (2), respectively.

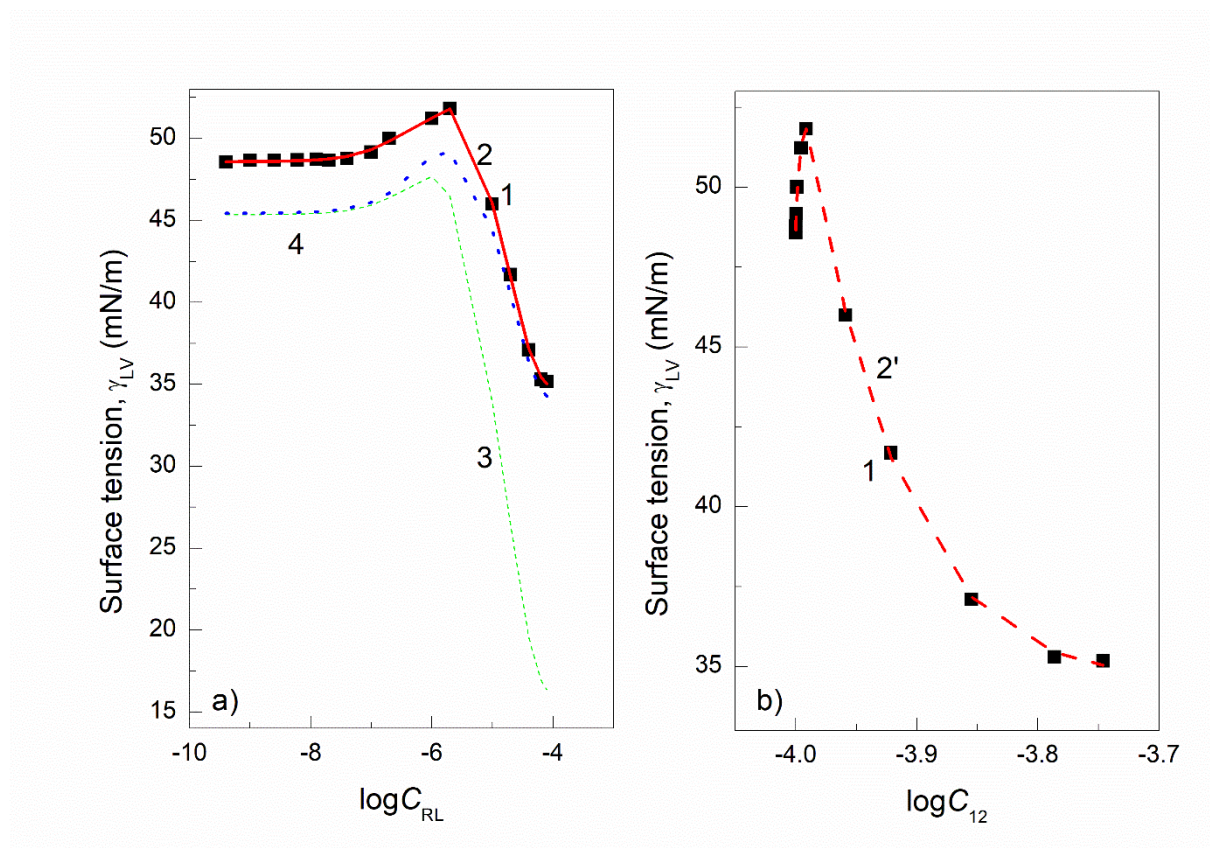

**Figure S8.** A plot of the surface tension ( $\gamma_{LV}$ ) of the aqueous solution of RL and TX165 mixture at the constant TX165 concentration equal to  $2 \times 10^{-4}$  mole/dm<sup>3</sup> vs. the logarithm of the RL concentration ( $C_{RL}$ ) (a) and the logarithm of the total concentration of the TX165 + RL mixture ( $C_{12}$ ) (b). Points 1 correspond to the measured values. Curves 2 and 2' correspond to the values calculated from Eq. (1), curves 3 and 4 correspond to the values calculated from Eqs. (3) and (4), respectively.



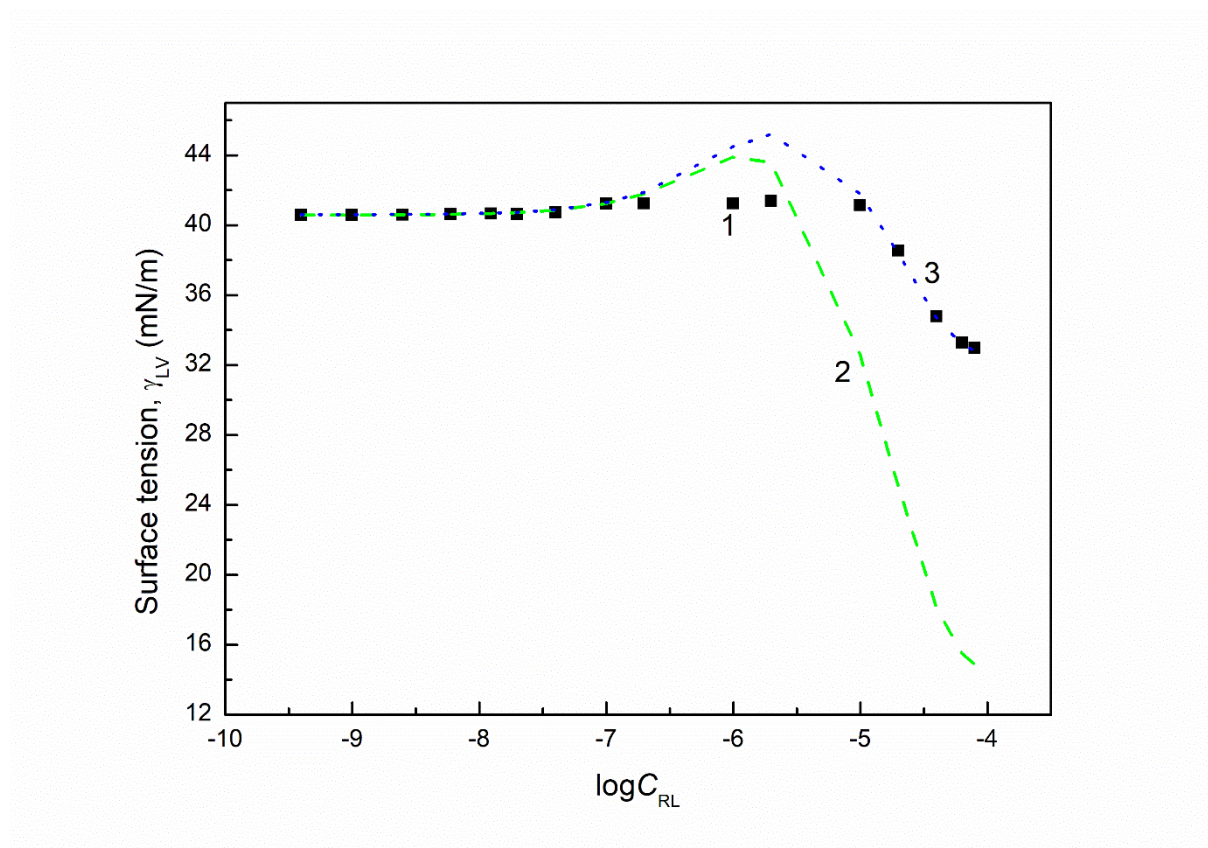

**Figure S9.** A plot of the surface tension ( $\gamma_{LV}$ ) of the aqueous solution of the RL and TX165 mixture at the constant TX165 concentration equal to  $1 \times 10^{-3}$  mole/dm<sup>3</sup> vs. the logarithm of the RL concentration ( $C_{RL}$ ). Points 1 correspond to the measured values. Curves 2 and 3 correspond to the values calculated from Eqs. (3) and (4), respectively.

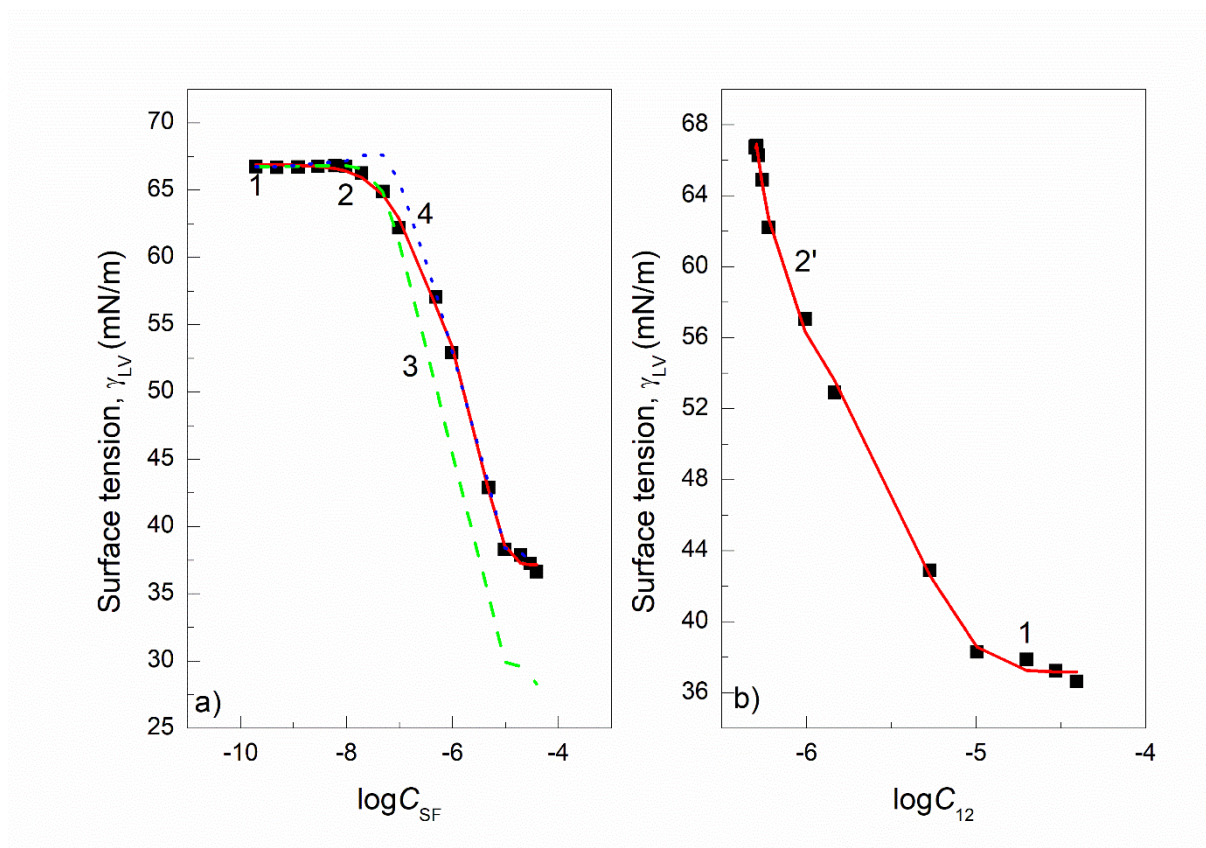

**Figure S10.** A plot of the surface tension ( $\gamma_{LV}$ ) of the aqueous solution of the SF and TX165 mixture at the constant TX165 concentration equal to  $5 \times 10^{-7}$  mole/dm<sup>3</sup> vs. the logarithm of the SF concentration ( $C_{SF}$ ) (a) and the logarithm of the total concentration of the TX165 + SF mixture ( $C_{12}$ ) (b). Points 1 correspond to the measured values. Curves 2 and 2' correspond to the values calculated from Eq. (1), curves 3 and 4 correspond to the values calculated from Eqs. (3) and (4), respectively.



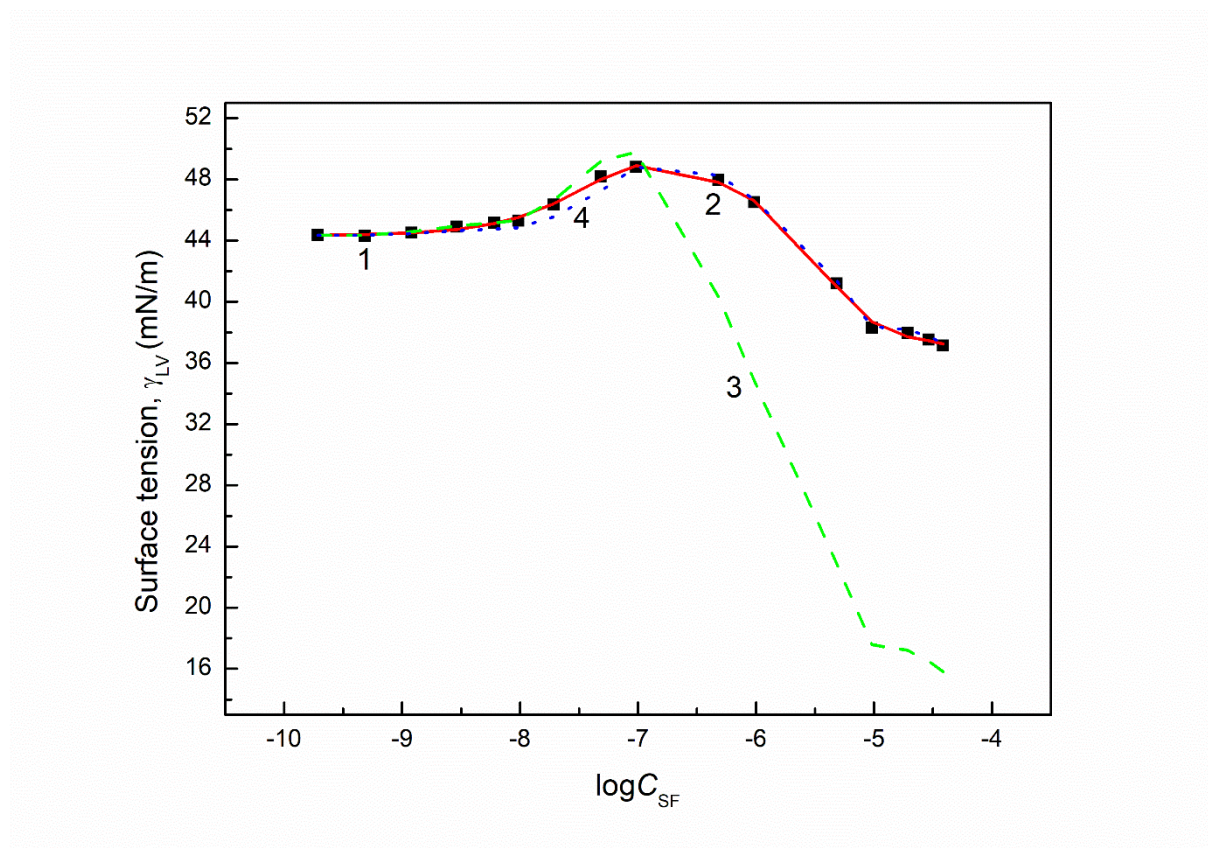

**Figure S11.** A plot of the surface tension ( $\gamma_{LV}$ ) of the aqueous solution of the SF and TX165 mixture at the constant TX165 concentration equal to  $2 \times 10^{-4}$  mole/dm<sup>3</sup> vs. the logarithm of the SF concentration ( $C_{SF}$ ). Points 1 correspond to the measured values. Curves 2, 3 and 4 correspond to the values calculated from Eqs. (1), (3) and (4), respectively.

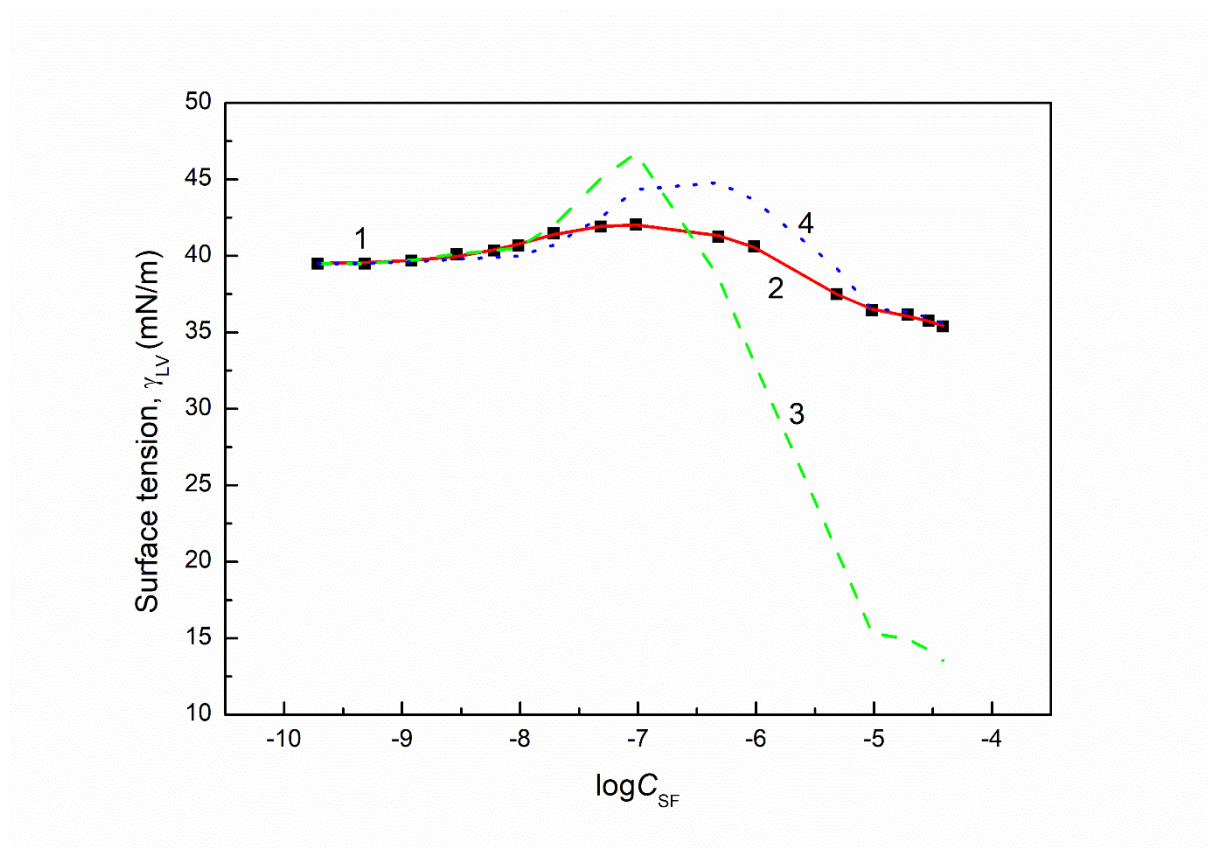

**Figure S12.** A plot of the surface tension ( $\gamma_{LV}$ ) of the aqueous solution of the SF and TX165 mixture at the constant TX165 concentration equal to  $1 \times 10^{-3}$  mole/dm<sup>3</sup> vs. the logarithm of the SF concentration ( $C_{SF}$ ). Points 1 correspond to the measured values. Curves 2, 3 and 4 correspond to the values calculated from Eqs. (1), (3) and (4), respectively.

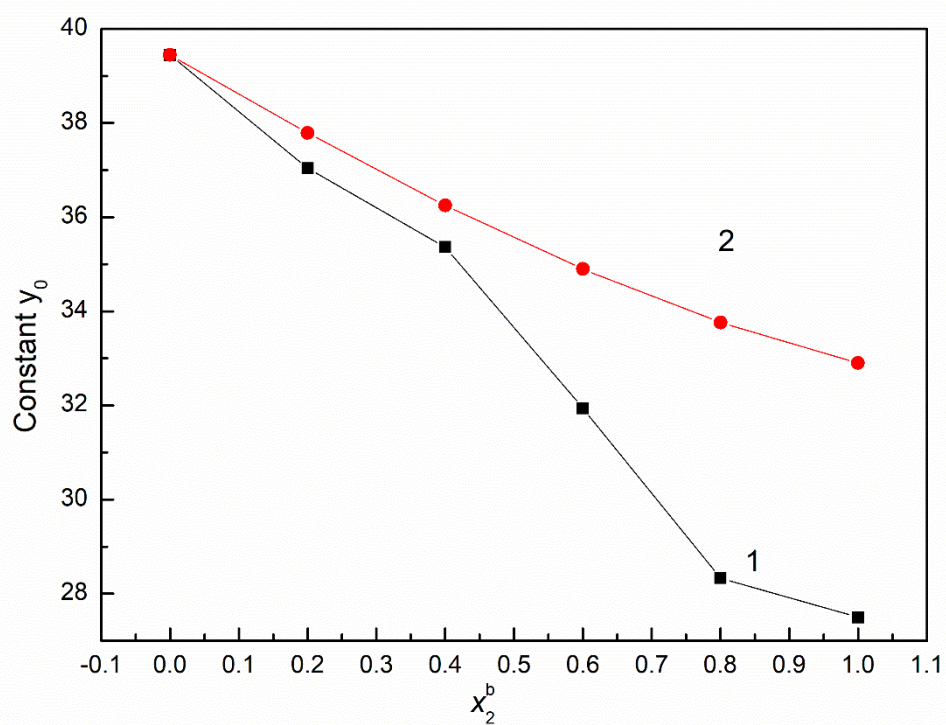

**Figure S13.** A plot of the constant  $y_0$  in Eq. (1) for the TX165 + RL (curve 1) and TX165 + SF (curve 2) aqueous solutions vs. the biosurfactant mole fraction in the mixture in the bulk phase ( $x_2^b$ ).

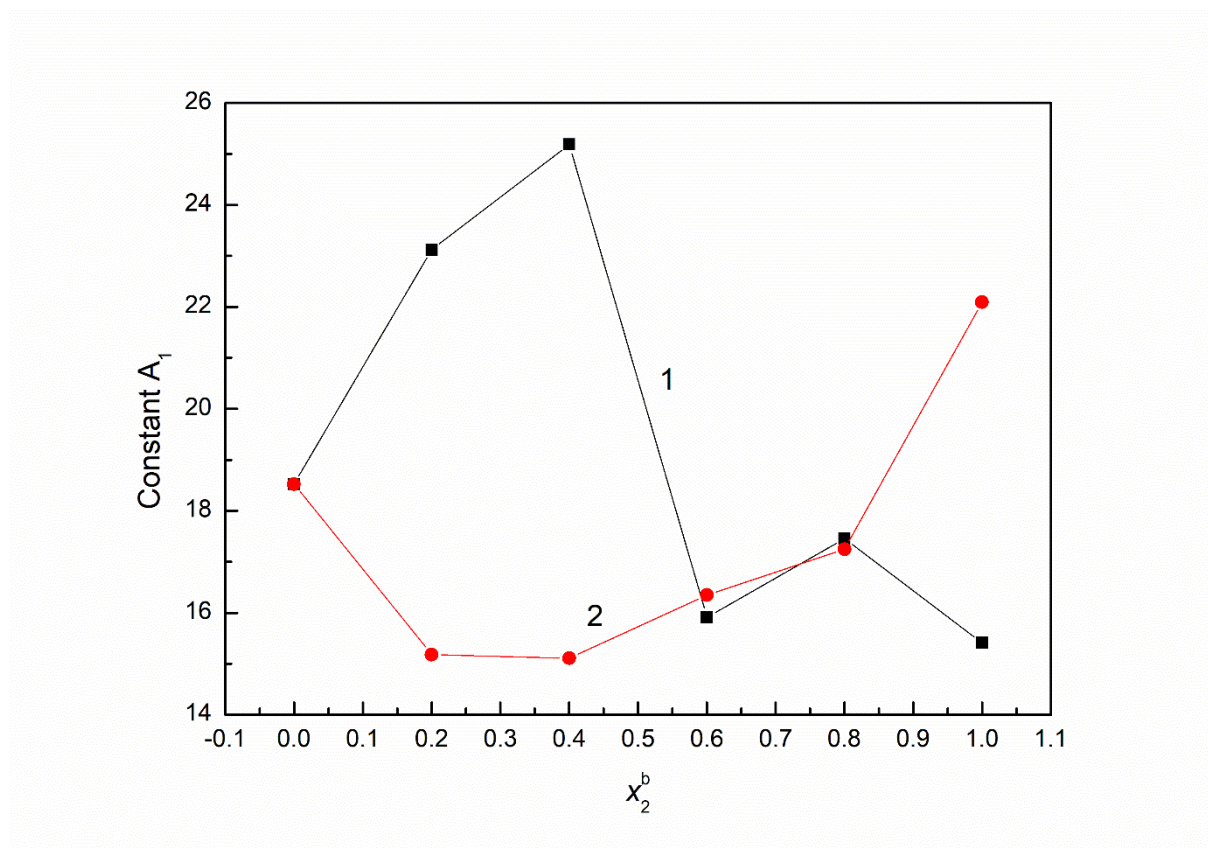

**Figure S14.** A plot of the constant  $A_1$  in Eq. (1) for the TX165 + RL (curve 1) and TX165 + SF (curve 2) aqueous solutions vs. the biosurfactant mole fraction in the mixture in the bulk phase ( $x_2^b$ ).



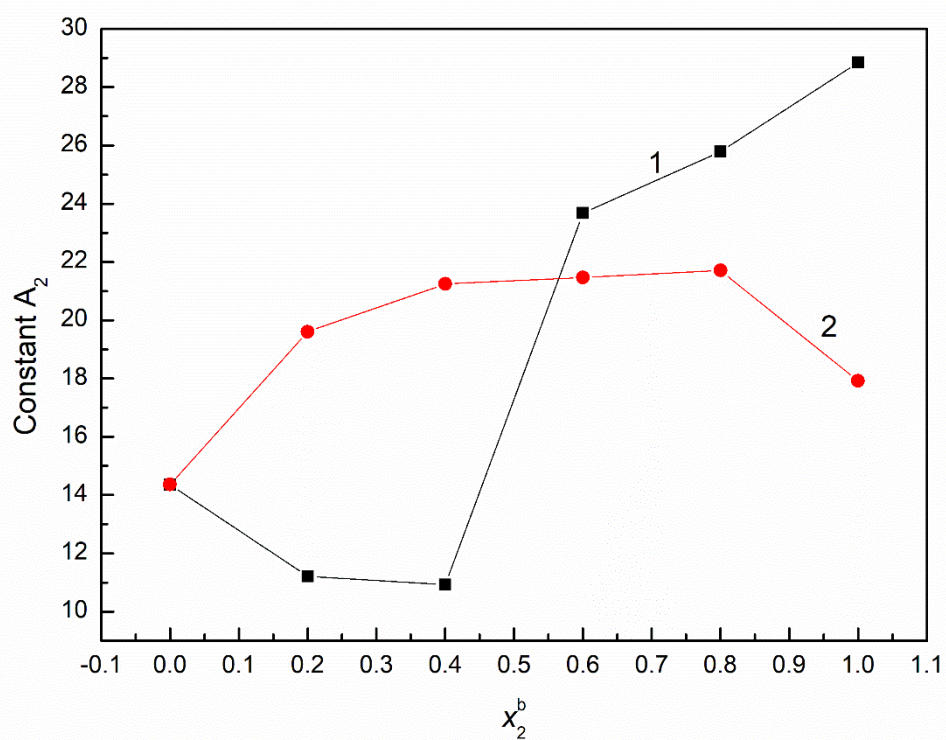

**Figure S15.** A plot of the constant  $A_2$  in Eq. (1) for the TX165 + RL (curve 1) and TX165 + SF (curve 2) aqueous solutions vs. the biosurfactant mole fraction in the mixture in the bulk phase ( $x_2^b$ ).



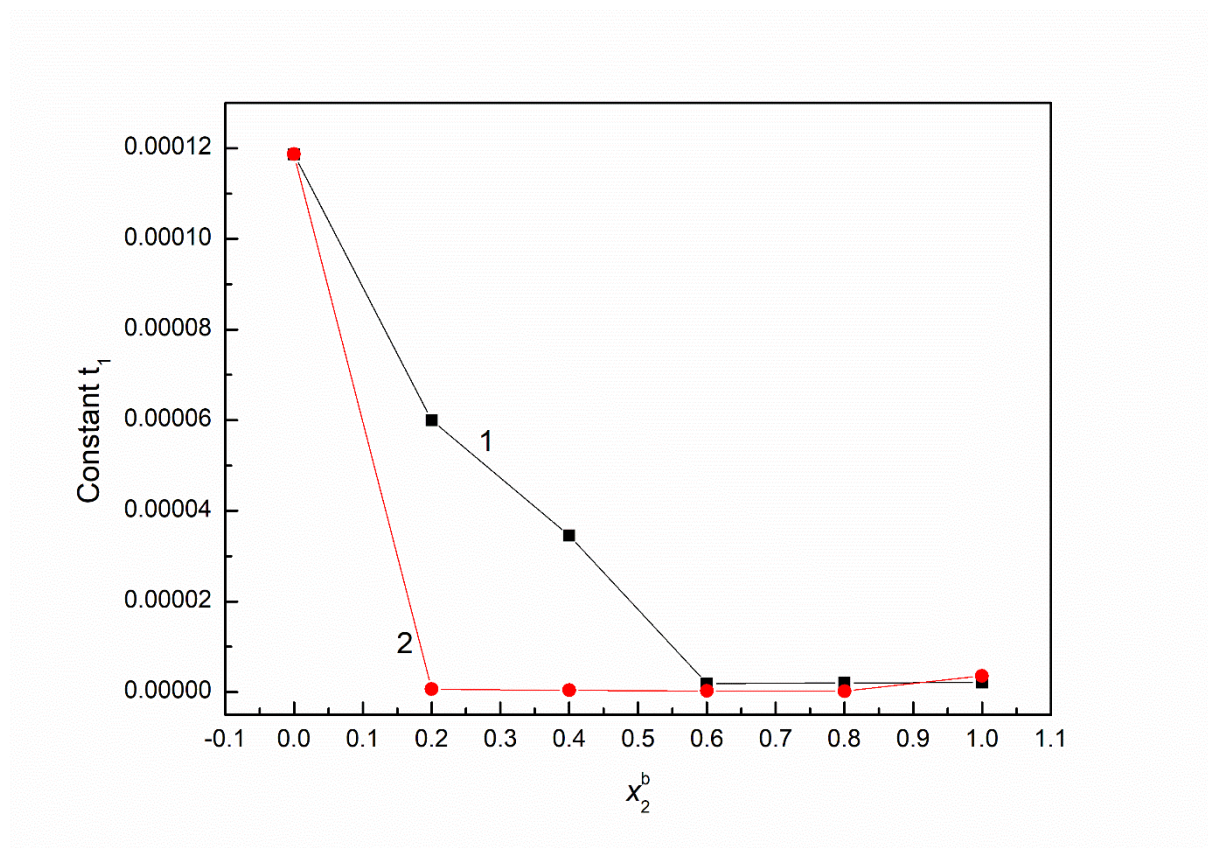

**Figure S16.** A plot of the constant  $t_1$  in Eq. (1) for the TX165 + RL (curve 1) and TX165 + SF (curve 2) aqueous solutions vs. the biosurfactant mole fraction in the mixture in the bulk phase ( $x_2^b$ ).

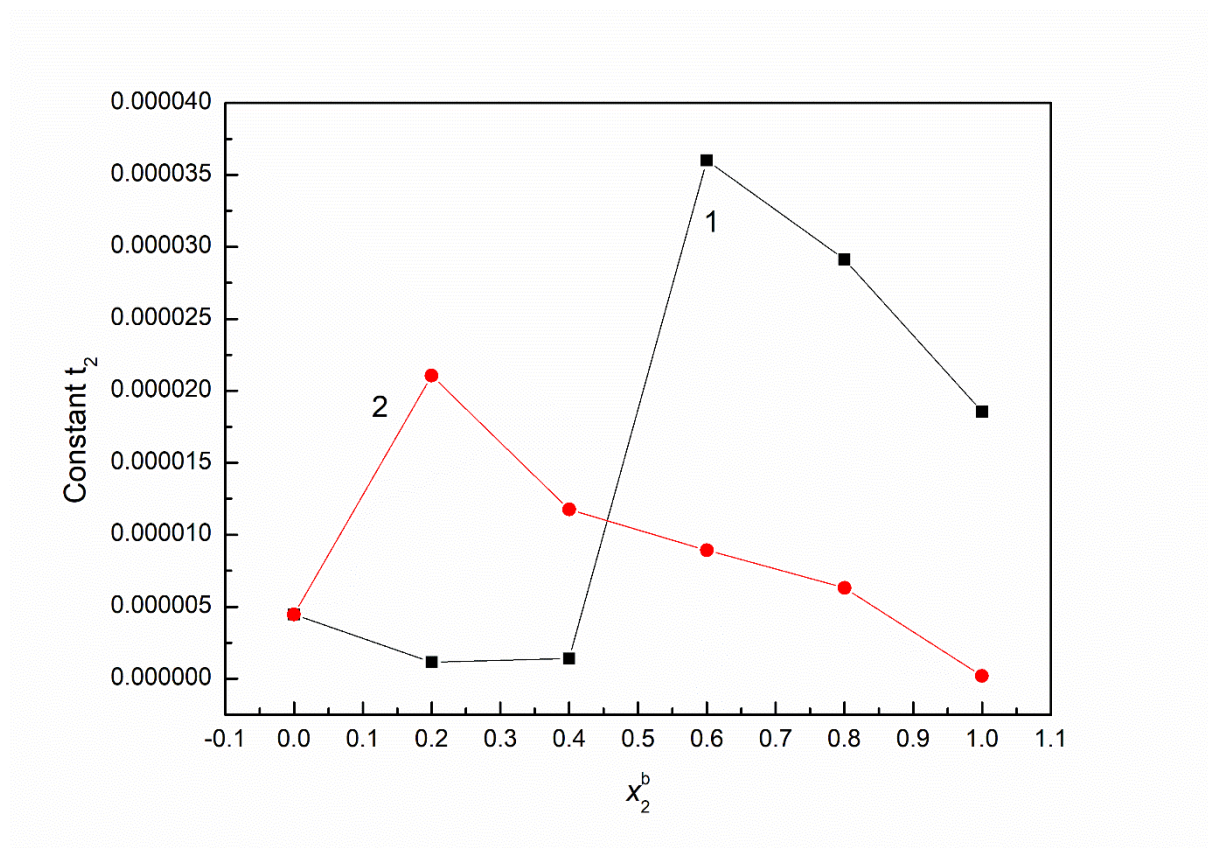

**Figure S17.** A plot of the constant  $t_2$  in Eq. (1) for the TX165 + RL (curve 1) and TX165 + SF (curve 2) aqueous solutions vs. the biosurfactant mole fraction in the mixture in the bulk phase ( $x_2^b$ ).

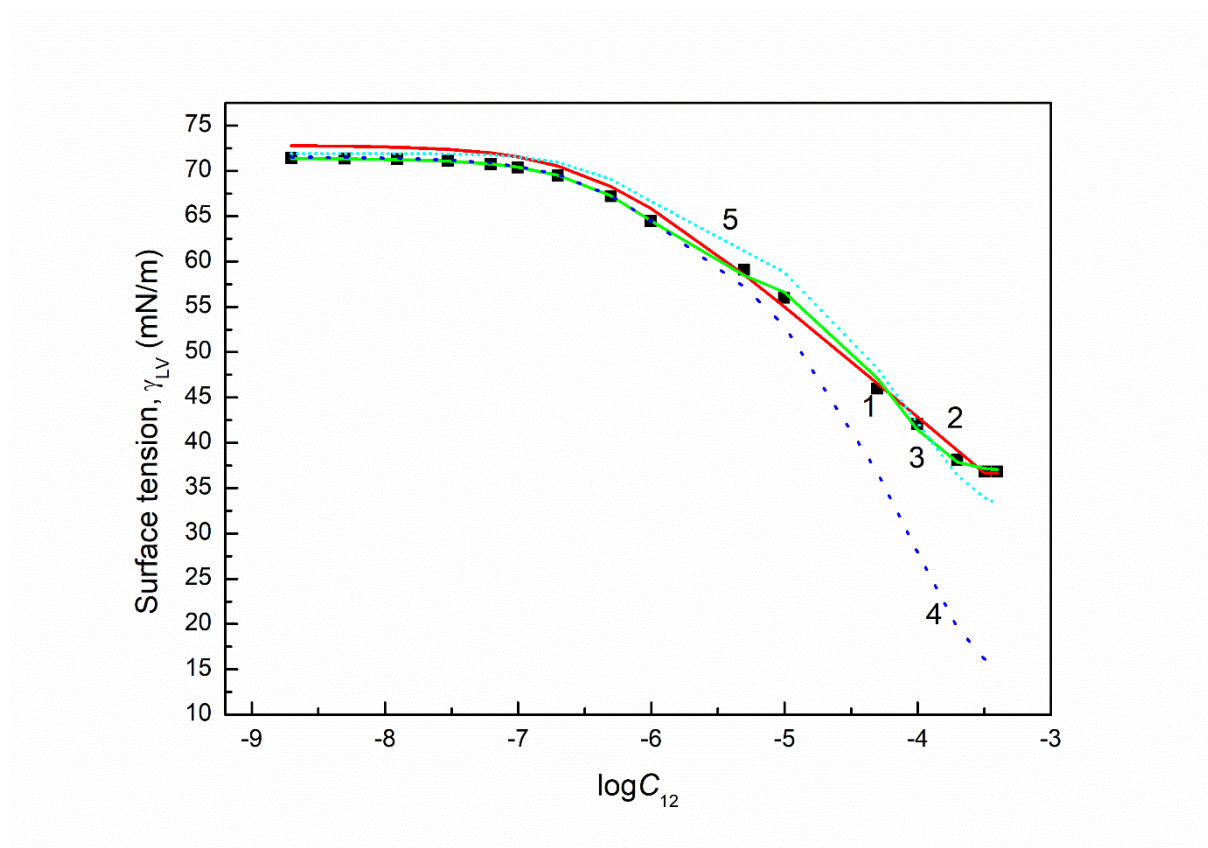

**Figure S18.** A plot of the surface tension ( $\gamma_{LV}$ ) of the aqueous solution of the RL and TX165 mixture at the RL mole fraction equal to 0.2 vs. the logarithm of the total concentration of the TX165 + RL mixture ( $C_{12}$ ). Points 1 correspond to the measured values. Curves 2, 3, 4 and 5 correspond to the values calculated from Eqs. (2), (1), (3) and (4), respectively.

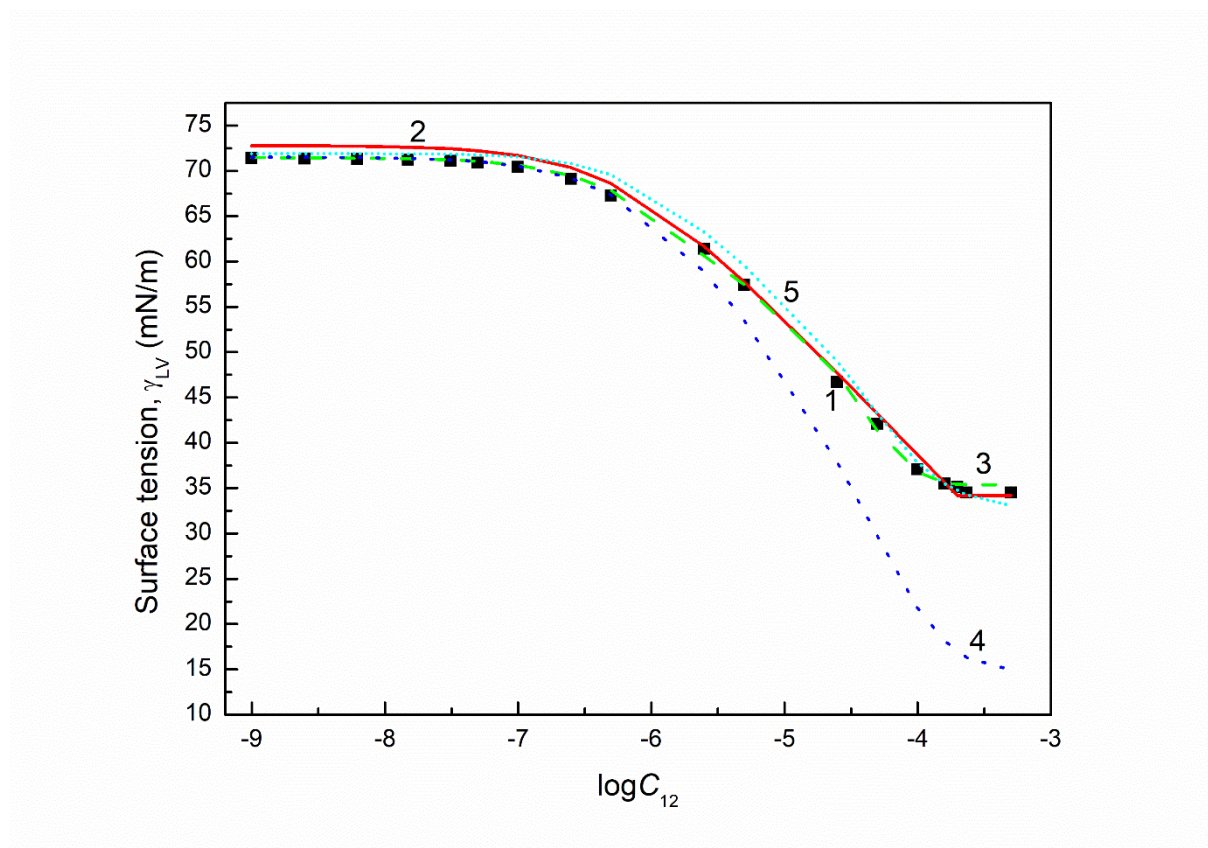

**Figure S19.** A plot of the surface tension ( $\gamma_{LV}$ ) of the aqueous solution of the RL and TX165 mixture at the RL mole fraction equal to 0.4 vs. the logarithm of the total concentration of the TX165 + RL mixture ( $C_{12}$ ). Points 1 correspond to the measured values. Curves 2, 3, 4 and 5 correspond to the values calculated from Eqs. (2), (1), (3) and (4), respectively.



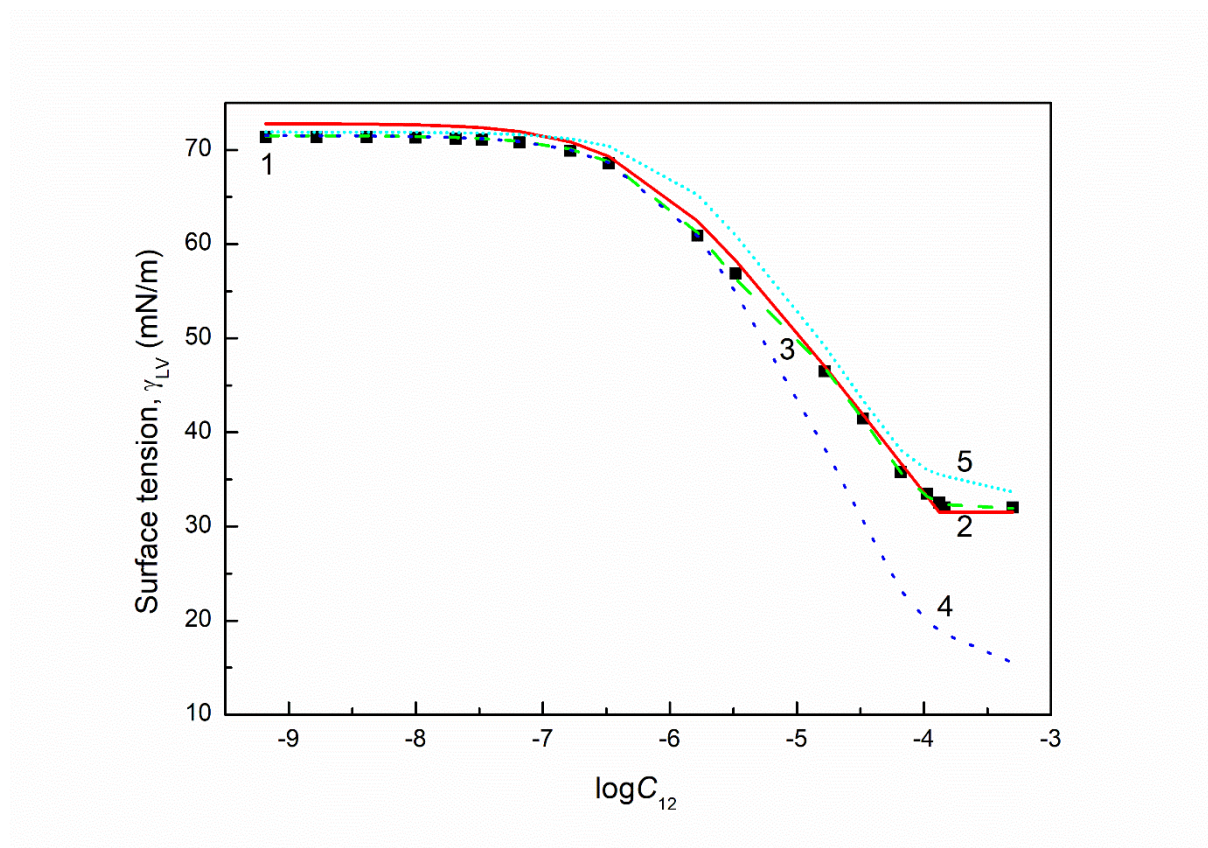

**Figure S20.** A plot of the surface tension ( $\gamma_{LV}$ ) of the aqueous solution of the RL and TX165 mixture at the RL mole fraction equal to 0.6 vs. the logarithm of the total concentration of the TX165 + RL mixture ( $C_{12}$ ). Points 1 correspond to the measured values. Curves 2, 3, 4 and 5 correspond to the values calculated from Eqs. (2), (1), (3) and (4), respectively.



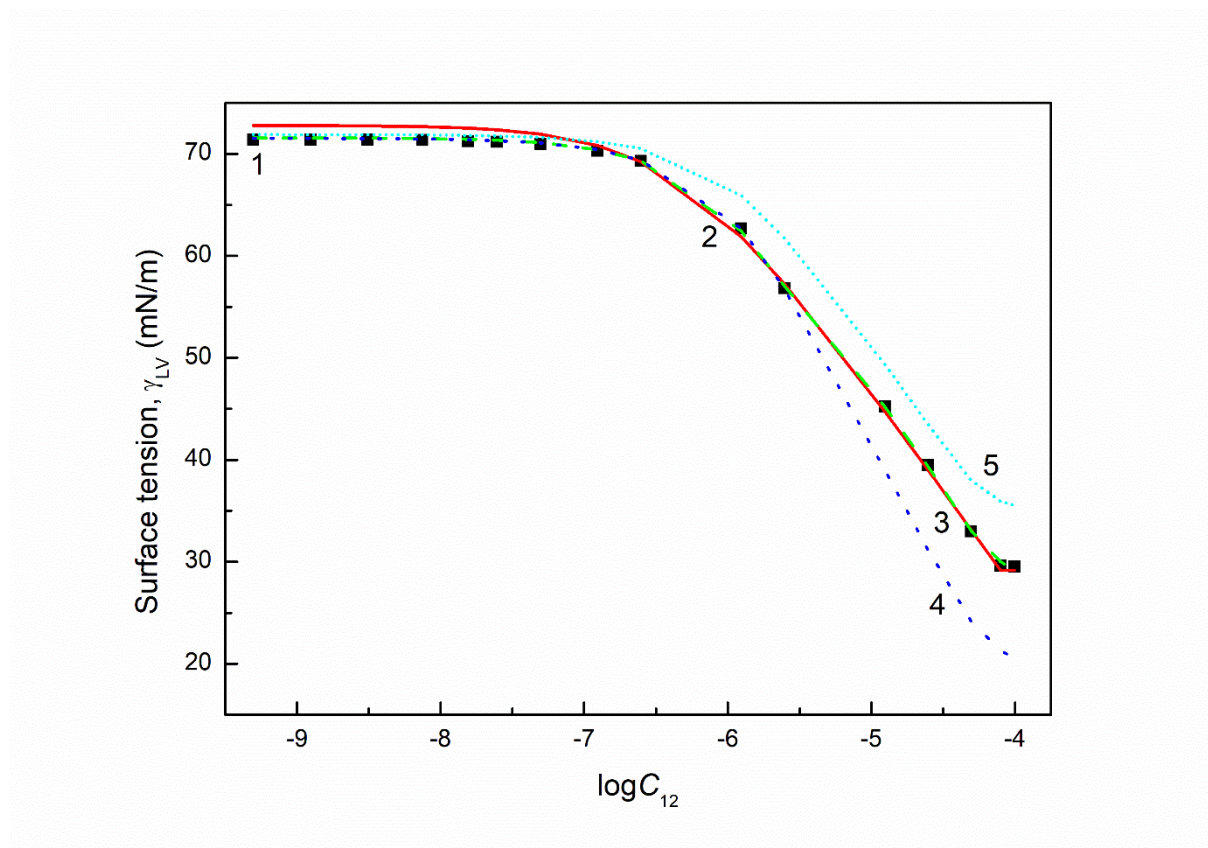

**Figure S21.** A plot of the surface tension ( $\gamma_{LV}$ ) of the aqueous solution of the RL and TX165 mixture at the RL mole fraction equal to 0.8 vs. the logarithm of the total concentration of the TX165 + RL mixture ( $C_{12}$ ). Points 1 correspond to the measured values. Curves 2, 3, 4 and 5 correspond to the values calculated from Eqs. (2), (1), (3) and (4), respectively.

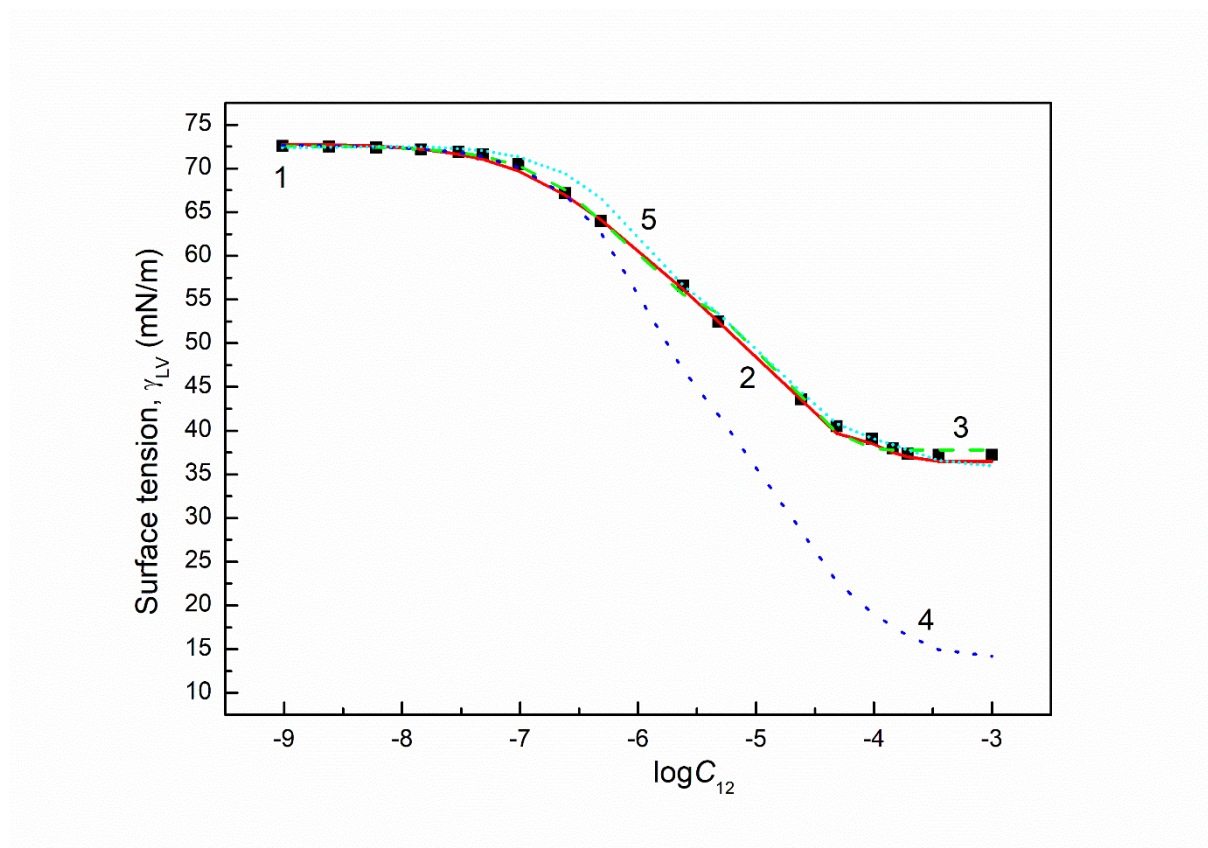

**Figure S22.** A plot of the surface tension ( $\gamma_{LV}$ ) of the aqueous solution of the SF and TX165 mixture at the SF mole fraction equal to 0.2 vs. the logarithm of the total concentration of the TX165 + SF mixture ( $C_{12}$ ). Points 1 correspond the measured values. Curves 2, 3, 4 and 5 correspond to the values calculated from Eqs. (2), (1), (3) and (4), respectively.

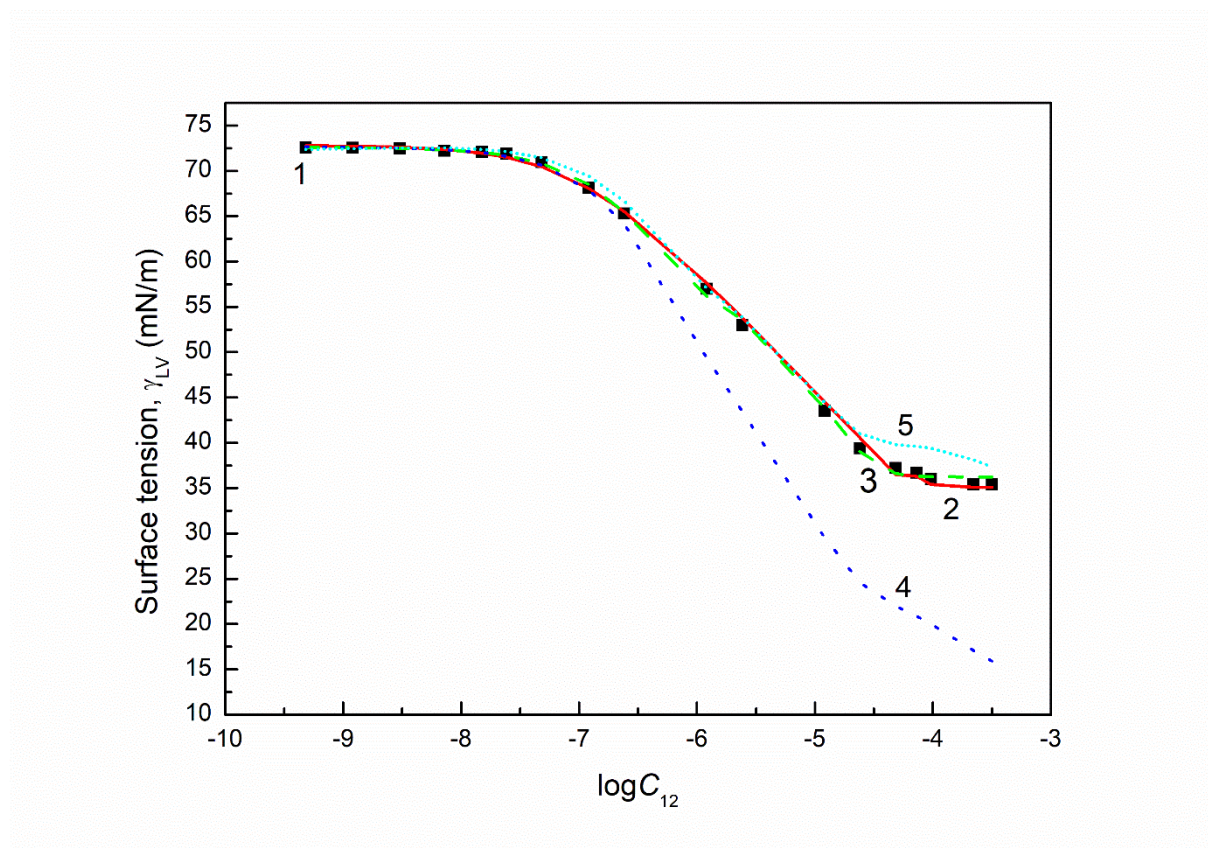

**Figure S23.** A plot of the surface tension ( $\gamma_{LV}$ ) of the aqueous solution of the SF and TX165 mixture at the SF mole fraction equal to 0.4 vs. the logarithm of the total concentration of the TX165 + SF mixture ( $C_{12}$ ). Points 1 correspond to the measured values. Curves 2, 3, 4 and 5 correspond to the values calculated from Eqs. (2), (1), (3) and (4), respectively.

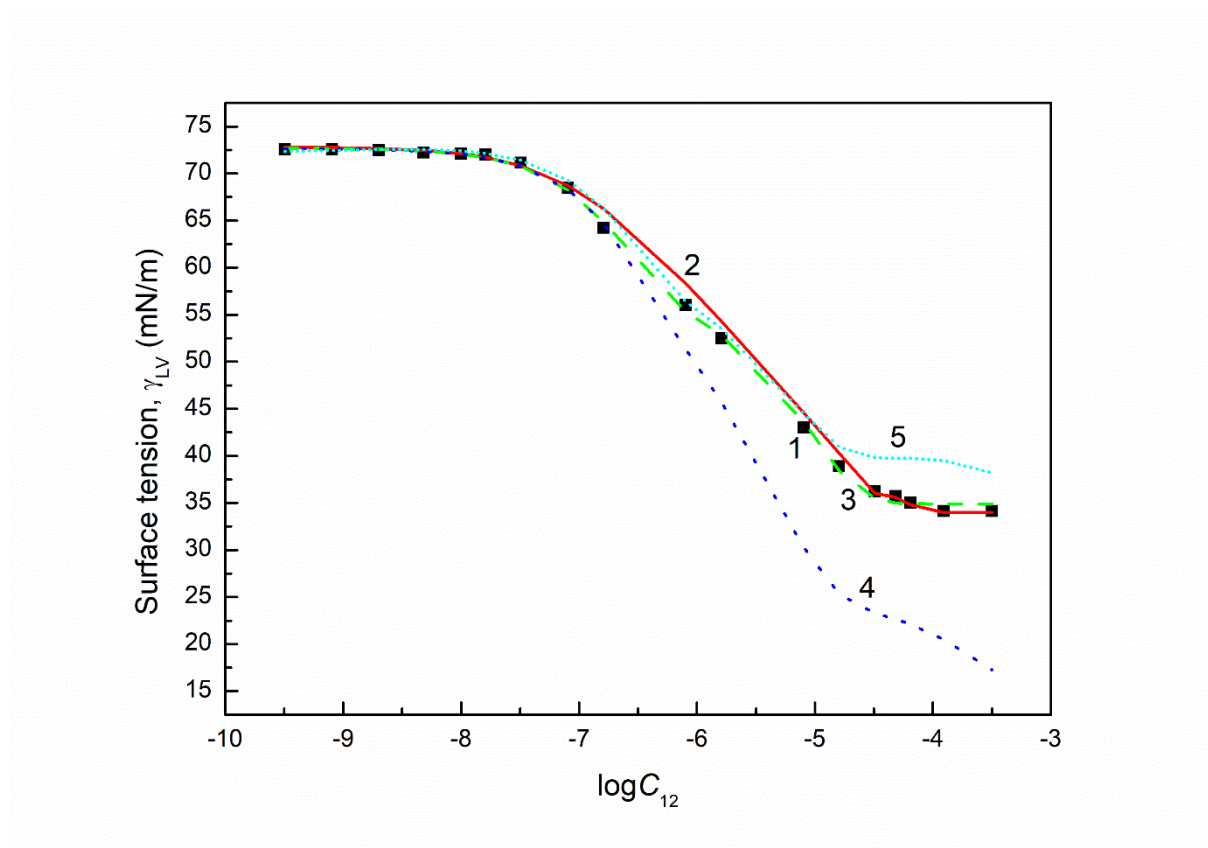

**Figure S24.** A plot of the surface tension ( $\gamma_{LV}$ ) of the aqueous solution of the SF and TX165 mixture at the SF mole fraction equal to 0.6 vs. the logarithm of the total concentration of the TX165 + SF mixture ( $C_{12}$ ). Points 1 correspond to the measured values. Curves 2, 3, 4 and 5 correspond to the values calculated from Eqs. (2), (1), (3) and (4), respectively.



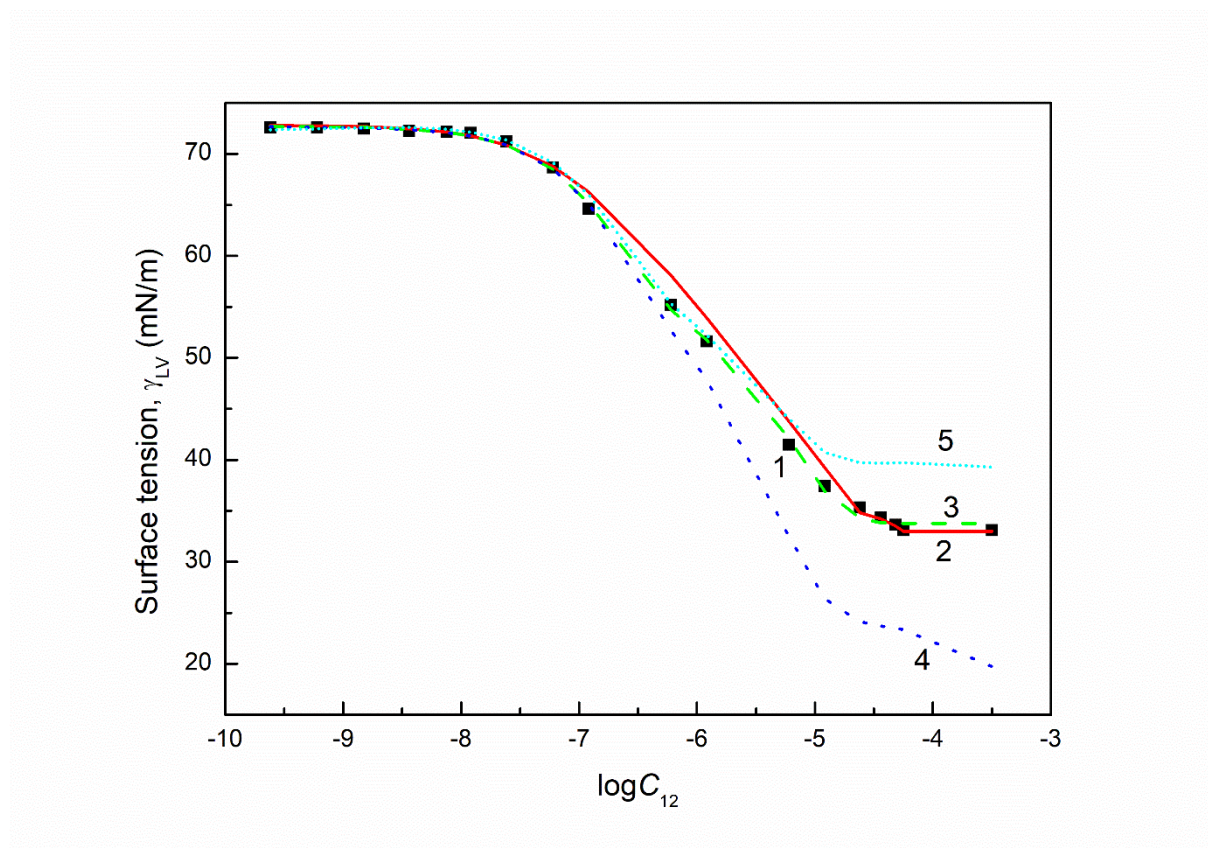

**Figure S25.** A plot of the surface tension ( $\gamma_{LV}$ ) of the aqueous solution of the SF and TX165 mixture at the SF mole fraction equal to 0.8 vs. the logarithm of the total concentration of TX165 + SF mixture ( $C_{12}$ ). Points 1 correspond to the measured values. Curves 2, 3, 4 and 5 correspond to the values calculated from Eqs. (2), (1), (3) and (4), respectively.



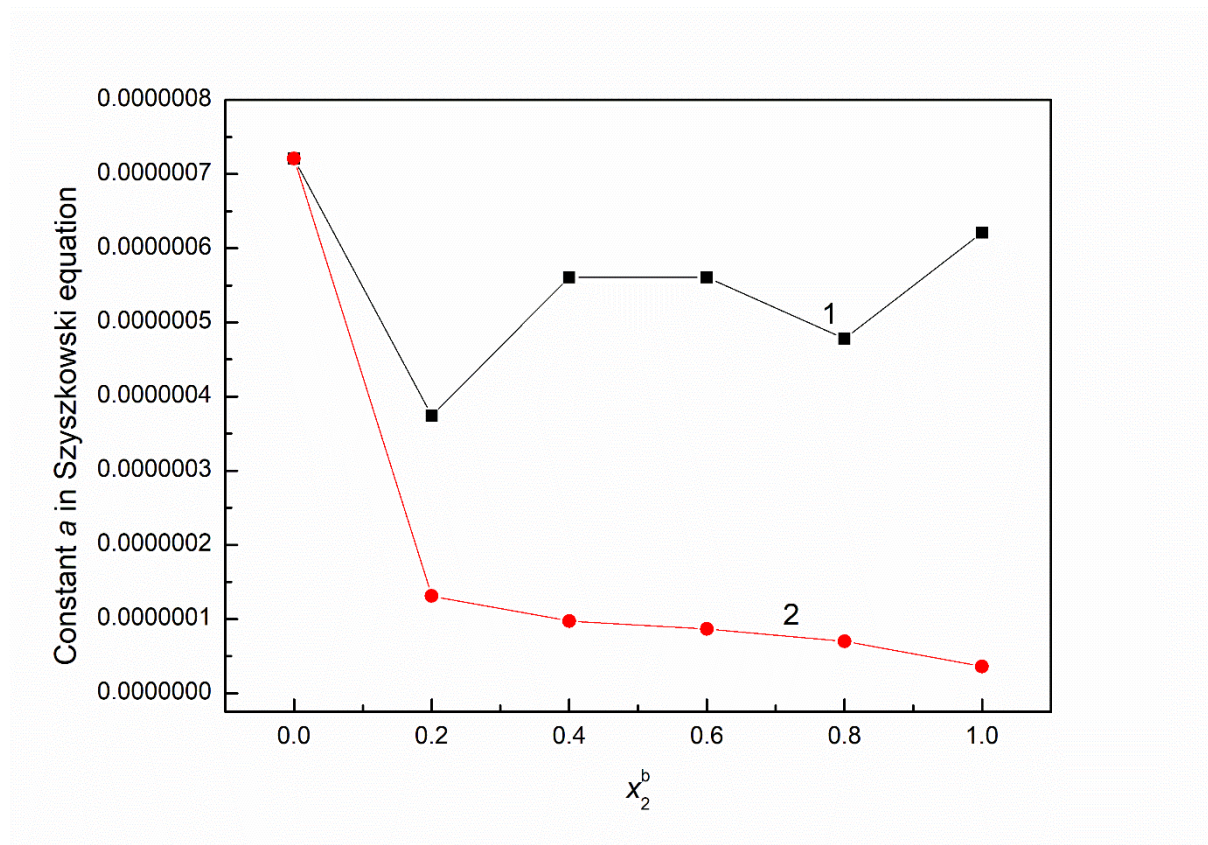

**Figure S26.** A plot of the constant  $a$  in the Szyszkowski equation (Eq. (2)) for the TX165 + RL (curve 1) and TX165 + SF (curve 2) aqueous solutions vs. the biosurfactant mole fraction in the mixture in the bulk phase ( $x_2^b$ ).

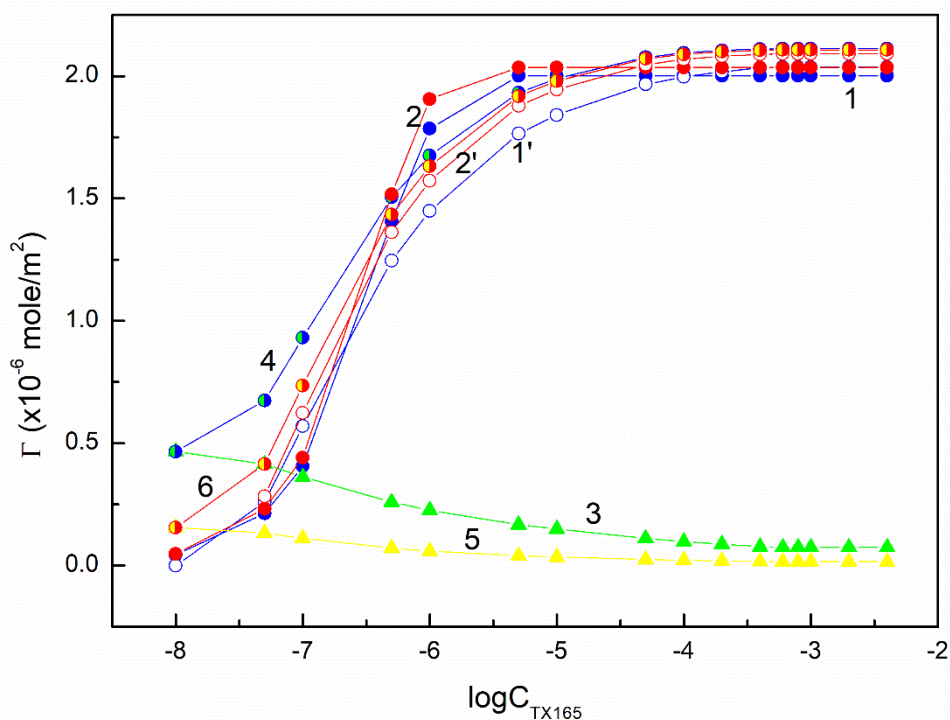

**Figure S27.** A plot of the surface concentration ( $\Gamma$ ) of TX165 (curves 1, 1', 2, 2'), RL (curve 3) and SF (curve 5) vs. the logarithm of TX165 concentration ( $C_{\text{TX165}}$ ) at the constant biosurfactant concentration equal to 0.00625 mg/dm<sup>3</sup>. Curves 1 and 2 correspond to the values calculated from Eq. (5), curves 1', 2' 3, 5 to the values calculated from Eq. (6). Curves 4 and 6 correspond to the sum values calculated from Eq. (6) for the TX165 + RL and TX165 + SF mixture, respectively.

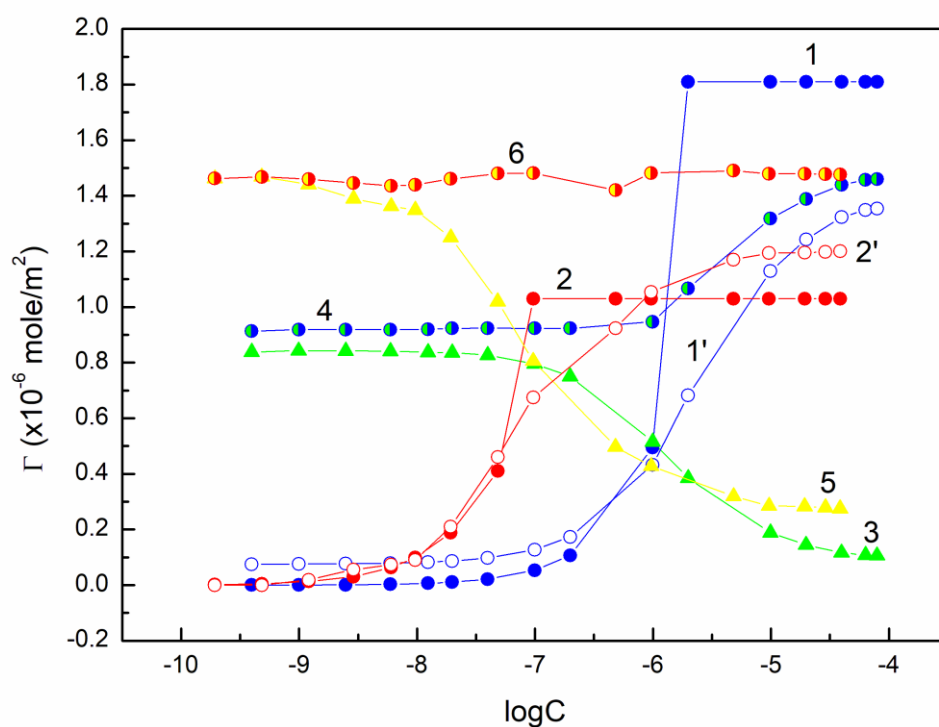

**Figure S28.** A plot of the surface concentration ( $\Gamma$ ) of RL (curves 1, 1'), SF (curves 2, 2') and TX165 (curves 3 and 5) vs. the logarithm of biosurfactant concentration ( $C$ ) at the constant TX165 concentration equal to  $5 \times 10^{-7}$  mole/dm<sup>3</sup>. Curves 1 and 2 correspond to the values calculated from Eq. (5), curves 1', 2' 3, 5 to the values calculated from Eq. (6). Curves 4 and 6 correspond to the sum values calculated from Eq. (6) for the TX165 + RL and TX165 + SF mixture, respectively.

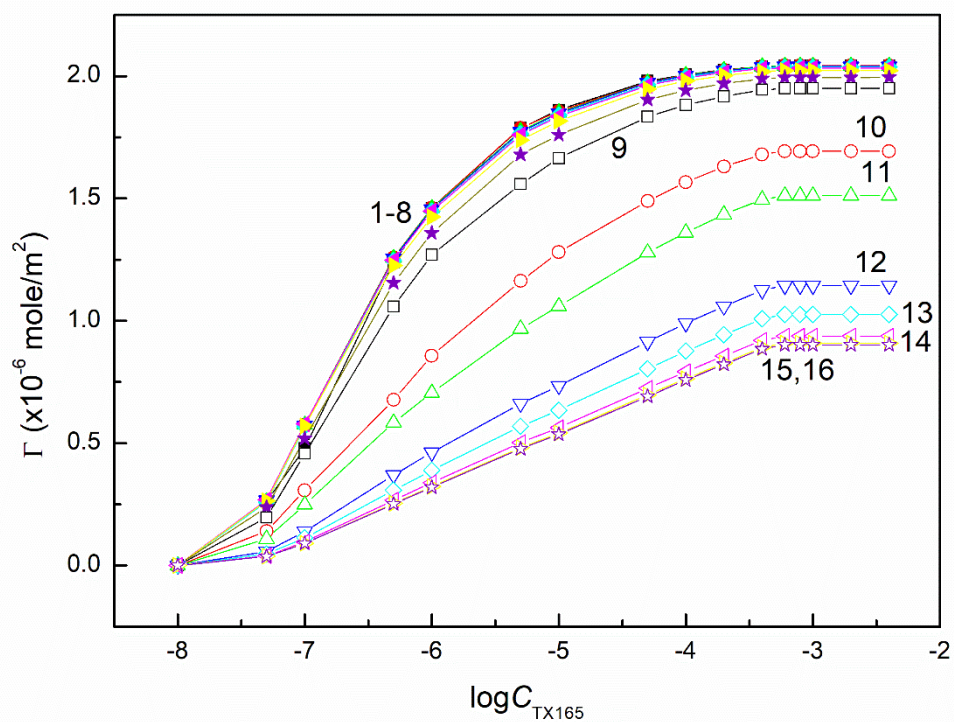

**Figure S29.** A plot of the surface concentration ( $\Gamma$ ) of TX165 calculated from Eq. (6) in the TX165 + RL mixture vs. the logarithm of its concentration ( $C_{TX165}$ ). Curves 1 – 16 correspond to the constant RL concentration equal to 0.0002, 0.0005, 0.00125, 0.003, 0.00625, 0.01, 0.02, 0.05, 0.1, 0.5, 1, 5, 10, 20, 30 and 40 mg/dm<sup>3</sup>, respectively.



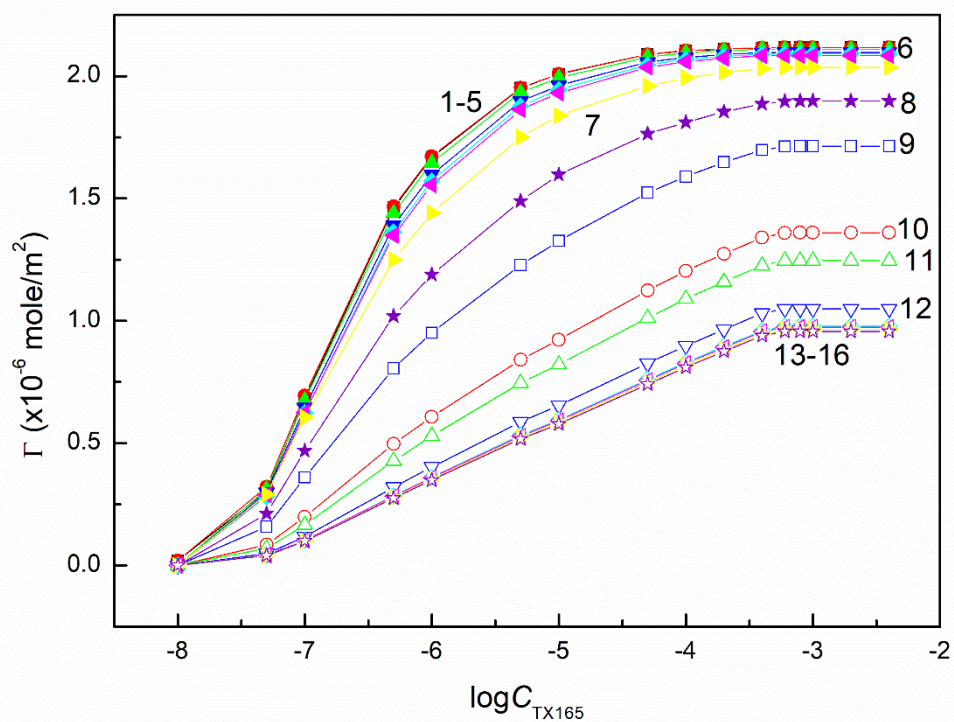

**Figure S30.** A plot of the surface concentration ( $\Gamma$ ) of TX165 calculated from Eq. (6) in the TX165 + SF mixture vs. the logarithm of its concentration ( $C_{\text{TX165}}$ ). Curves 1 – 16 correspond to the constant SF concentration equal to 0.0002, 0.0005, 0.00125, 0.003, 0.00625, 0.01, 0.02, 0.05, 0.1, 0.5, 1, 5, 10, 20, 30 and 40 mg/dm<sup>3</sup>, respectively.

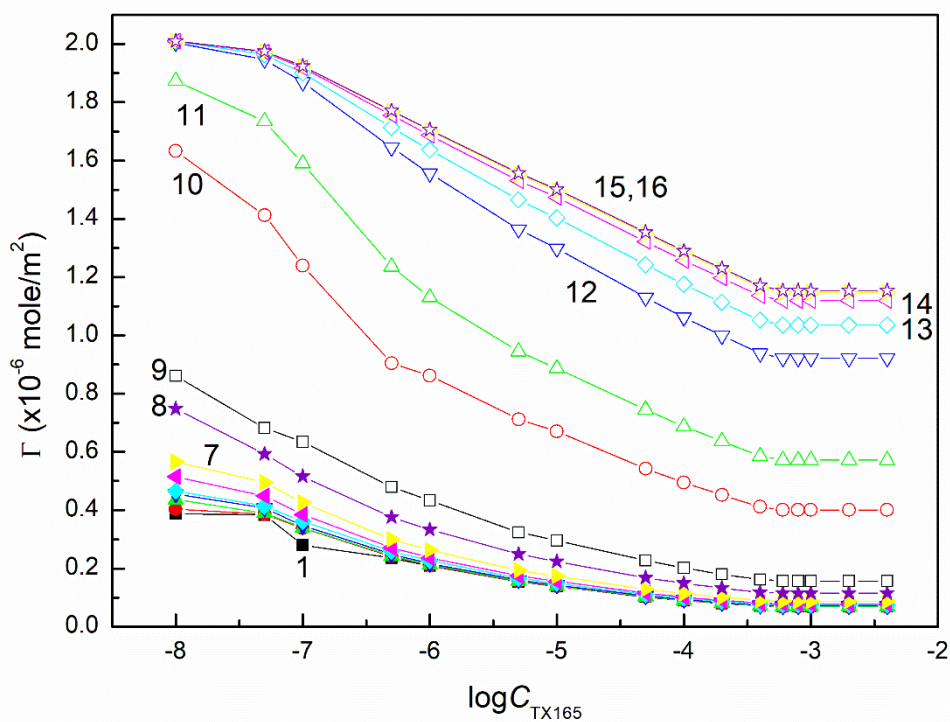

**Figure S31.** A plot of the surface concentration ( $\Gamma$ ) of RL calculated from Eq. (6) in the TX165 + RL mixture vs. the logarithm of TX165 concentration ( $C_{\text{TX165}}$ ). Curves 1 – 16 correspond to the constant RL concentration equal to 0.0002, 0.0005, 0.00125, 0.003, 0.00625, 0.01, 0.02, 0.05, 0.1, 0.5, 1, 5, 10, 20, 30 and 40 mg/dm<sup>3</sup>, respectively.

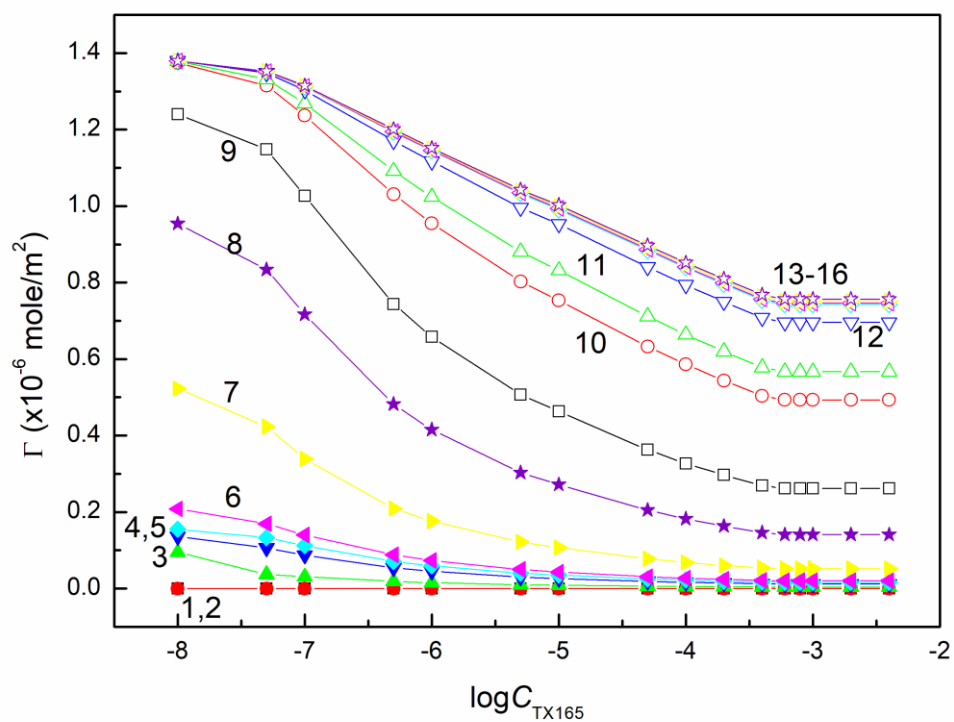

**Figure S32.** A plot of the surface concentration ( $\Gamma$ ) of SF calculated from Eq. (6) in the TX165 + SF mixture vs. the logarithm of TX165 concentration ( $C_{TX165}$ ). Curves 1 – 16 correspond to the constant SF concentration equal to 0.0002, 0.0005, 0.00125, 0.003, 0.00625, 0.01, 0.02, 0.05, 0.1, 0.5, 1, 5, 10, 20, 30 and 40 mg/dm<sup>3</sup>, respectively.

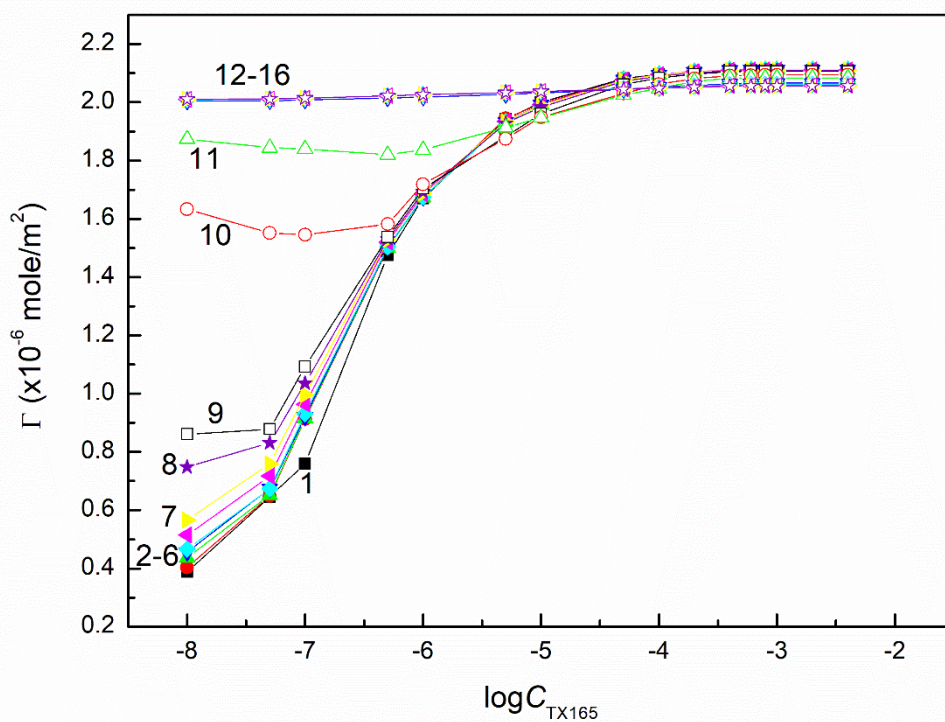

**Figure S33.** A plot of the total surface concentration ( $\Gamma$ ) of the TX165 + RL mixture calculated from Eq. (6) vs. the logarithm of TX165 concentration ( $C_{\text{TX165}}$ ). Curves 1 – 16 correspond to the constant RL concentration equal to 0.0002, 0.0005, 0.00125, 0.003, 0.00625, 0.01, 0.02, 0.05, 0.1, 0.5, 1, 5, 10, 20, 30 and 40 mg/dm<sup>3</sup>, respectively.



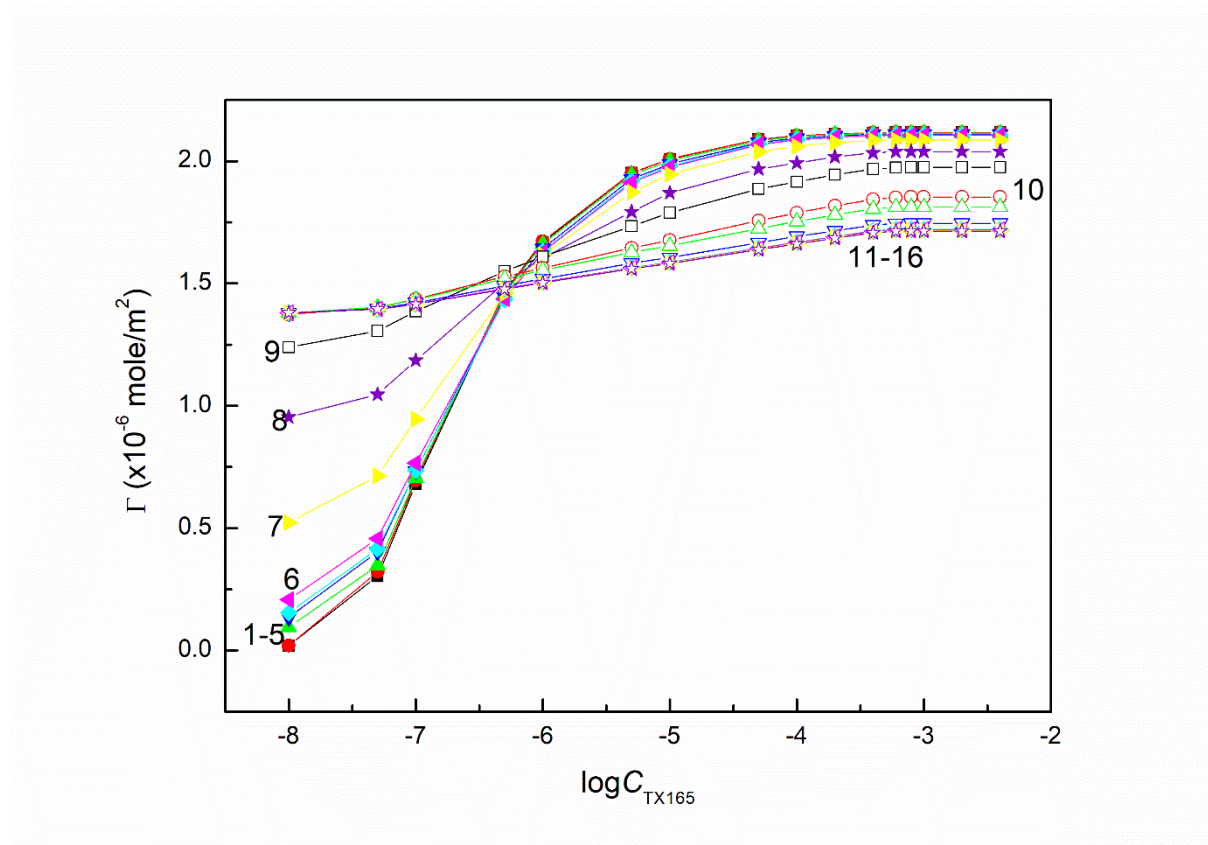

**Figure S34.** A plot of the total surface concentration ( $\Gamma$ ) of the TX165 + SF mixture calculated from Eq. (6) vs. the logarithm of TX165 concentration ( $C_{\text{TX165}}$ ). Curves 1 – 16 correspond to the constant SF concentration equal to 0.0002, 0.0005, 0.00125, 0.003, 0.00625, 0.01, 0.02, 0.05, 0.1, 0.5, 1, 5, 10, 20, 30 and 40 mg/dm<sup>3</sup>, respectively.

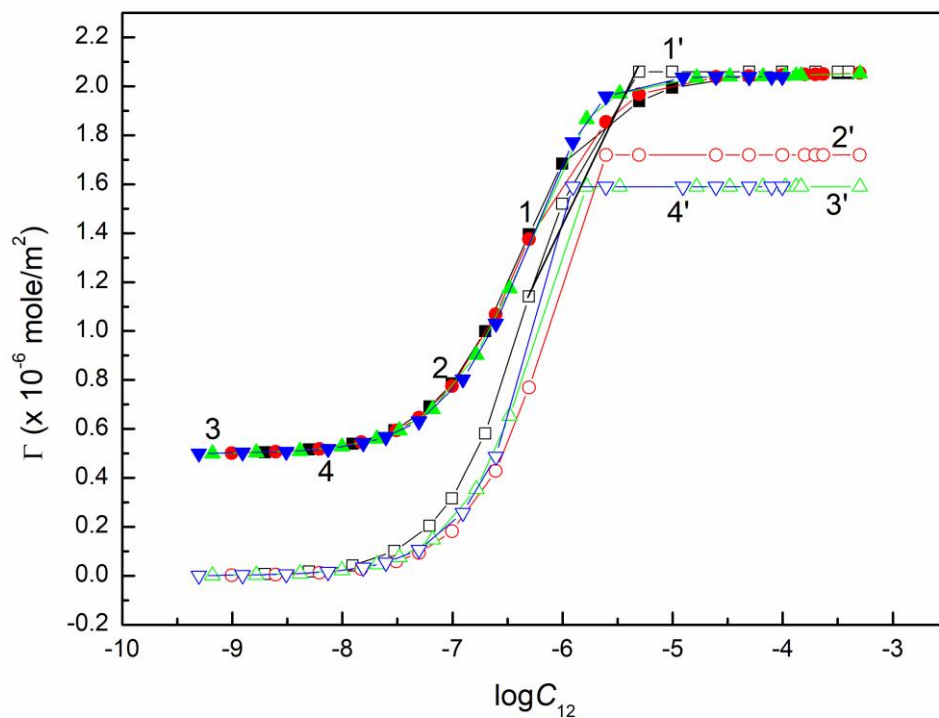

**Figure S35.** A plot of the total surface concentration ( $\Gamma$ ) of the TX165 + RL mixture calculated from Eq. (6) (curves 1, 2, 3 and 4) and Gibbs surface concentration calculated from Eq. (5) vs. the logarithm of the total concentration of RL+TX165 mixture ( $C_{12}$ ). Curves 1 and 1' correspond to the RL mole fraction in the mixture in the bulk phase equal to 0.2, curves 2 and 2' to 0.4, curves 3 and 3' to 0.6 and curves 4 and 4' correspond to the RL mole fraction in the mixture in the bulk phase equal 0.8, respectively.

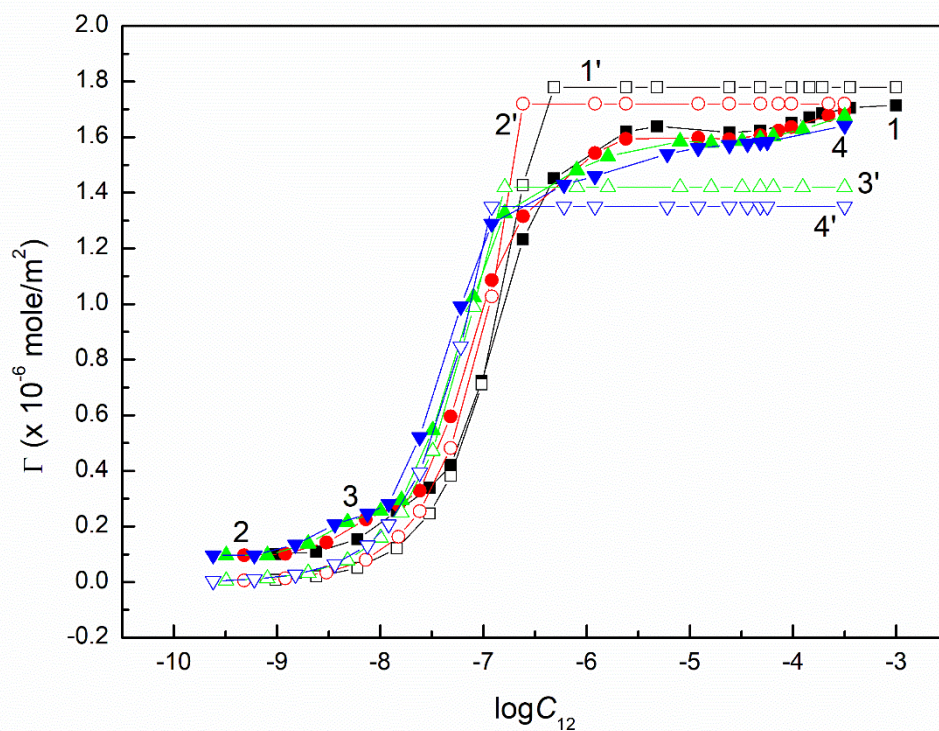

**Figure S36.** A plot of the total surface concentration ( $\Gamma$ ) of the TX165 + SF mixture calculated from Eq. (6) (curves 1, 2, 3 and 4) and Gibbs surface concentration calculated from Eq. (5) vs. the logarithm of the total concentration of TX165 + SF mixture ( $C_{12}$ ). Curves 1 and 1' correspond to the SF mole fraction in the mixture in the bulk phase equal to 0.2, curves 2 and 2' to 0.4, curves 3 and 3' to 0.6 and curves 4 and 4' correspond to the SF mole fraction in the mixture in the bulk phase equal 0.8, respectively.

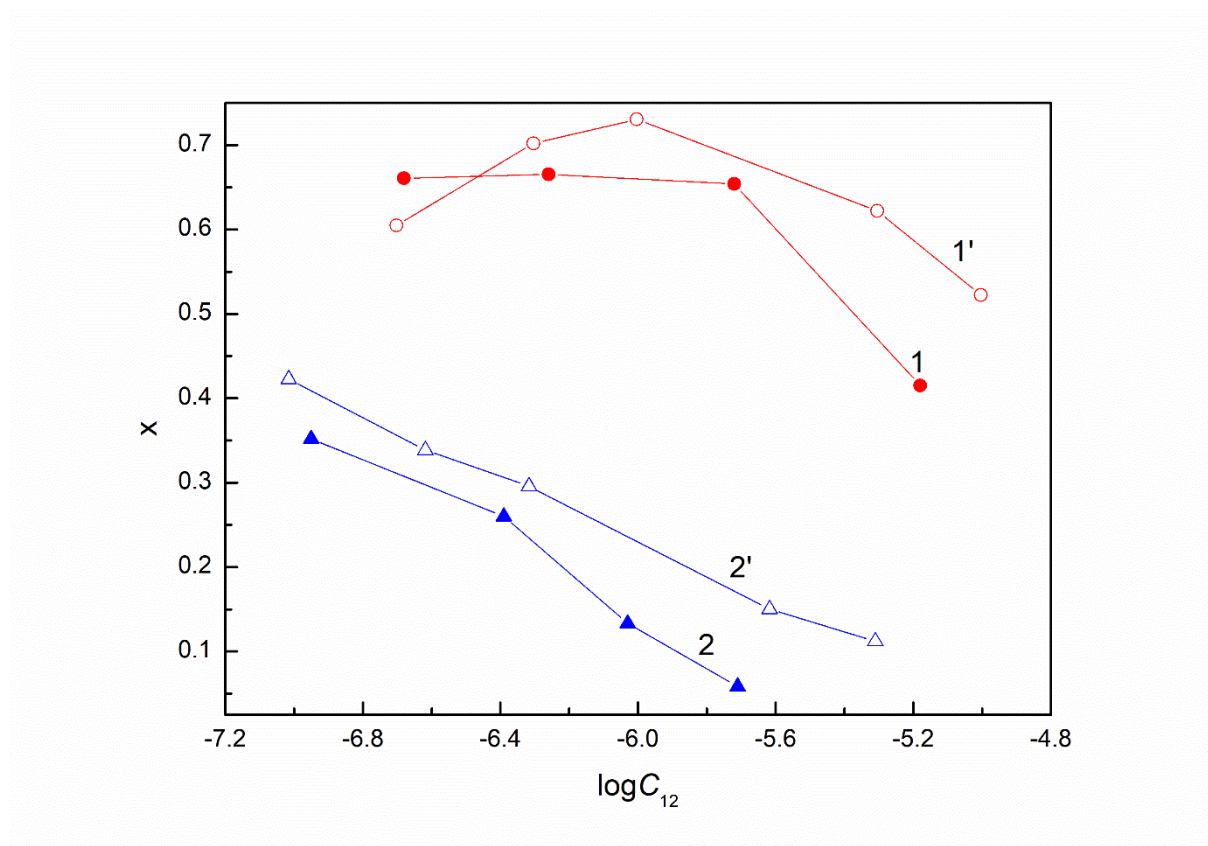

**Figure S37.** A plot of the TX165 mole fraction in the mixture with RL (curves 1 and 1') and SF (curves 2 and 2') ( $x$ ) at the constant biosurfactant mole fraction in the mixture in the bulk phase equal to 0.2 vs. the total concentration of the TX165 + RL mixture ( $C_{12}$ ). Curves 1 and 2 correspond to the values obtained from Eq. (7), curves 1' and 2' correspond to the values calculated from the expression  $x_1^S = \frac{\pi_1}{\pi_1 + \pi_2}$



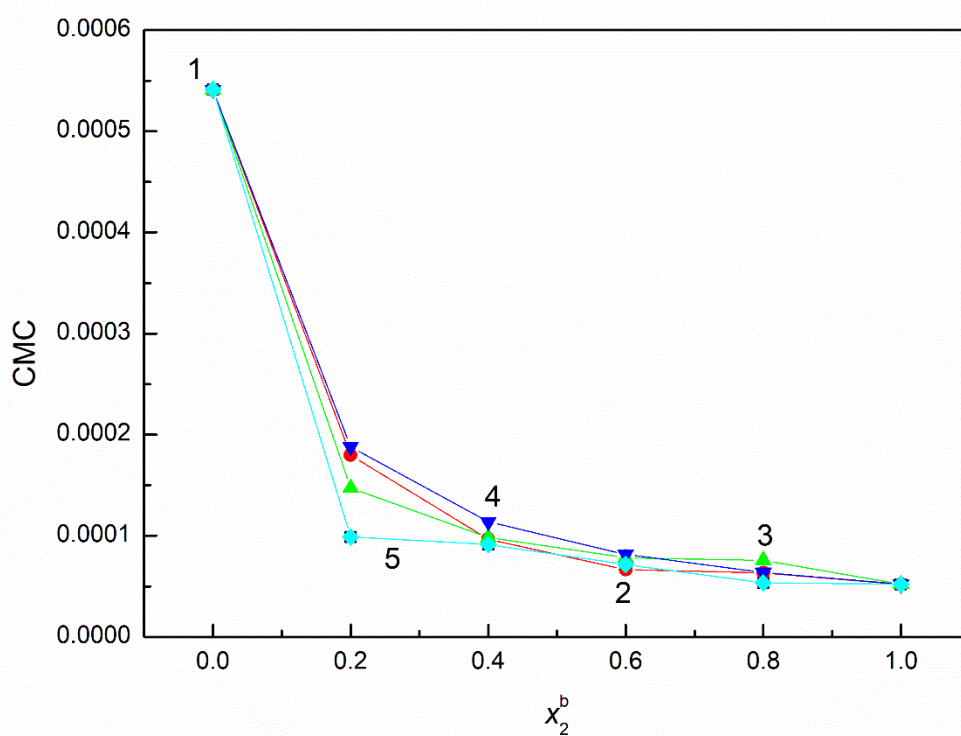

**Figure S38.** A plot of the CMC values of TX165 + RL and their mixtures vs. the RL mole fraction in the mixture in the bulk phase ( $x_2^b$ ). Curve 1 corresponds to the CMC values of mixtures determined from surface tension isotherms, curves 2 and 3 correspond to the CMC calculated from Eq. (10), curves 4 and 5 to the values calculated from Eqs. (9) and (15).

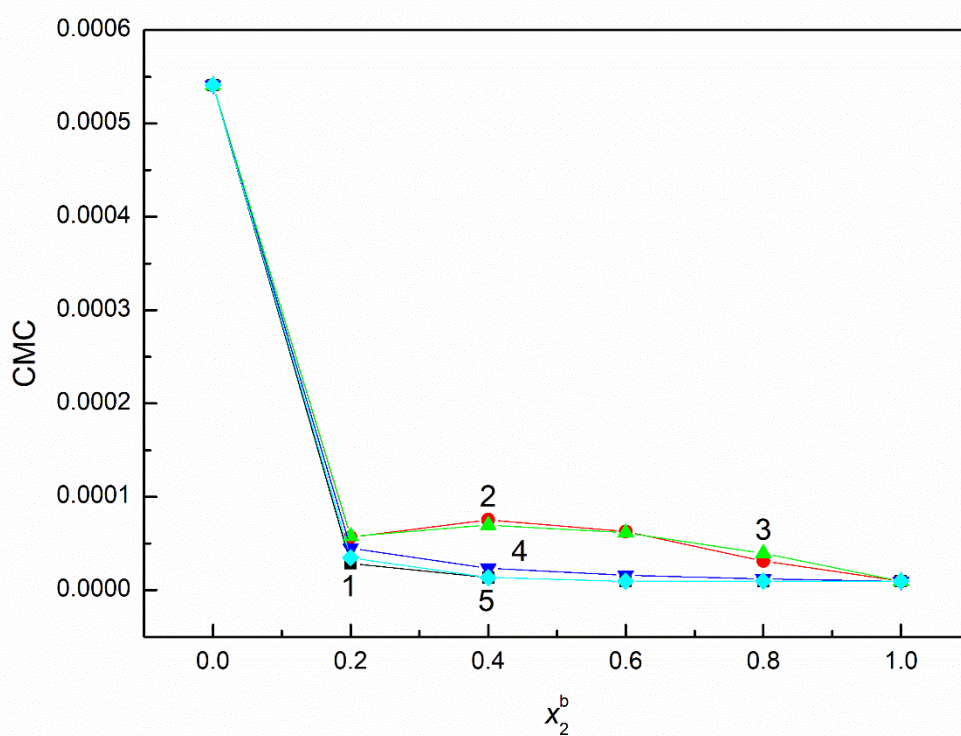

**Figure S39.** A plot of the CMC values of TX165 + SF and their mixtures vs. the SF mole fraction in the mixture in the bulk phase ( $x_2^b$ ). Curve 1 corresponds to the CMC values of mixtures determined from surface tension isotherms, curves 2 and 3 correspond to the CMC calculated from Eq. (10), curves 4 and 5 to the values calculated from Eqs. (9) and (15).

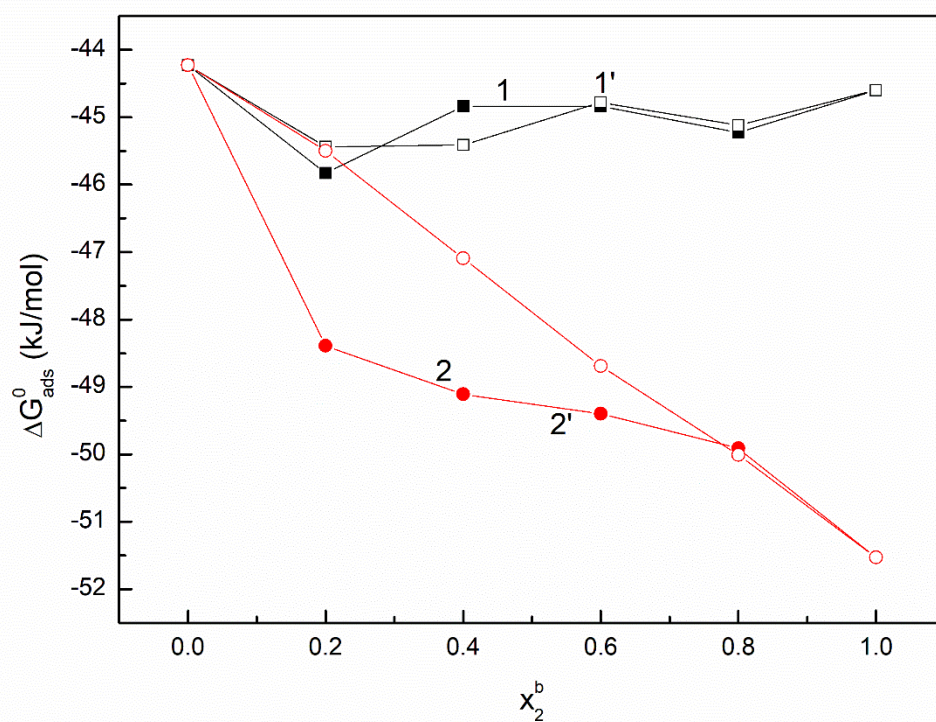

**Figure S40.** A plot of the Gibbs standard free energy of TX165 + RL (curves 1 and 1') and TX165 + SF (curves 2 and 2') adsorption at the water-air interface vs. the biosurfactant mole fraction in the mixture in the bulk phase ( $x_2^b$ ). Curves 1 and 2 correspond to values calculated from Eq. (16), curves 1' and 2' to values calculated from Eq. (17), respectively.

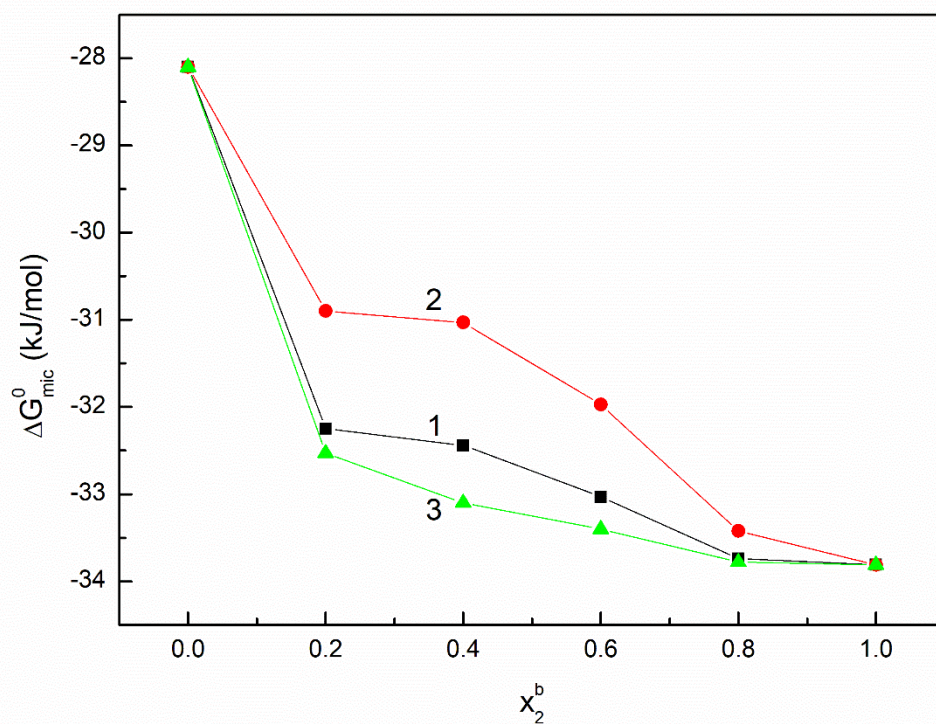

**Figure S41.** A plot of the Gibbs standard free energy of TX165 + RL micellization vs. the RL mole fraction in the mixture in the bulk phase ( $x_2^b$ ) calculated from Eq. (21) (curve 1) and from Eq. (22) (curves 2 and 3). Curves 2 and 3 correspond to values calculated taking in the Eq. (22)  $x_1^b, x_2^b$  and  $x_1^M, x_2^M$ , respectively.



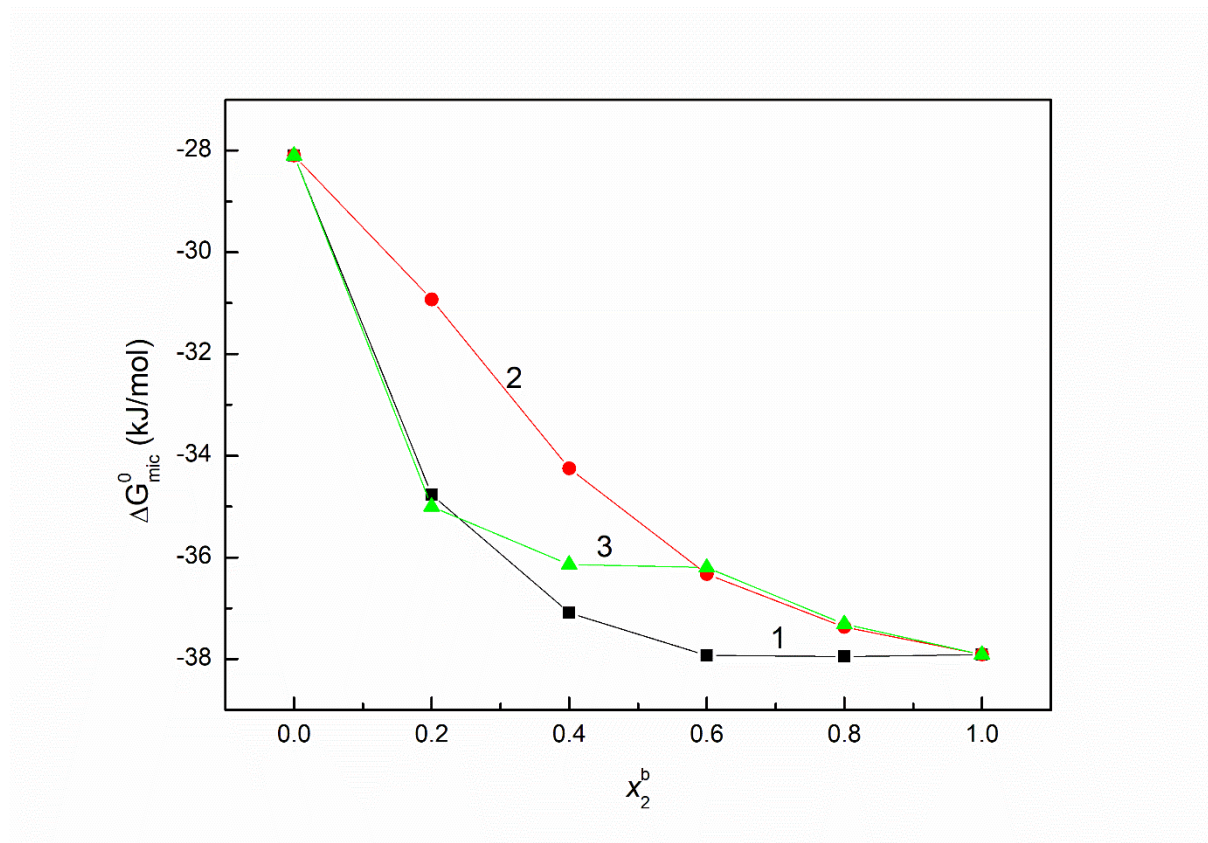

**Figure S42.** A plot of the Gibbs standard free energy of TX165 + SF micellization vs. the SF mole fraction in the mixture in the bulk phase ( $x_2^b$ ) calculated from Eq. (21) (curve 1) and from Eq. (22) (curves 2 and 3). Curves 2 and 3 correspond to values calculated taking in the Eq. (22)  $x_1^b, x_2^b$  and  $x_1^M, x_2^M$ , respectively.
